# Supplementary material for: Cervical ripening at home or in-hospital—prospective cohort study and process evaluation (CHOICE) study: a protocol
Source: PubMed Central journal article supplement (PMC8098973; doi:10.1136/bmjopen-2021-050452), 2021-05-04

# BMJ Open

BMJ Open is committed to open peer review. As part of this commitment we make the peer review history of every article we publish publicly available.

When an article is published we post the peer reviewers' comments and the authors' responses online. We also post the versions of the paper that were used during peer review. These are the versions that the peer review comments apply to.

The versions of the paper that follow are the versions that were submitted during the peer review process. They are not the versions of record or the final published versions. They should not be cited or distributed as the published version of this manuscript.

BMJ Open is an open access journal and the full, final, typeset and author-corrected version of record of the manuscript is available on our site with no access controls, subscription charges or pay-per-view fees (<http://bmjopen.bmj.com>).

If you have any questions on BMJ Open's open peer review process please email [info.bmjopen@bmj.com](mailto:info.bmjopen@bmj.com)

# BMJ Open

## Cervical ripening at home or in-hospital - prospective cohort study and process evaluation (CHOICE) study: Protocol

|                               |                                                                                                                                                                                                                                                                                                                                                                                                                                                                                                                                                                                                                                                                                                                                                                                                                                                                                                                                                                                                                                                                                                                                                                                                                                                                                                                                                                                                           |
|-------------------------------|-----------------------------------------------------------------------------------------------------------------------------------------------------------------------------------------------------------------------------------------------------------------------------------------------------------------------------------------------------------------------------------------------------------------------------------------------------------------------------------------------------------------------------------------------------------------------------------------------------------------------------------------------------------------------------------------------------------------------------------------------------------------------------------------------------------------------------------------------------------------------------------------------------------------------------------------------------------------------------------------------------------------------------------------------------------------------------------------------------------------------------------------------------------------------------------------------------------------------------------------------------------------------------------------------------------------------------------------------------------------------------------------------------------|
| Journal:                      | <i>BMJ Open</i>                                                                                                                                                                                                                                                                                                                                                                                                                                                                                                                                                                                                                                                                                                                                                                                                                                                                                                                                                                                                                                                                                                                                                                                                                                                                                                                                                                                           |
| Manuscript ID                 | bmjopen-2021-050452                                                                                                                                                                                                                                                                                                                                                                                                                                                                                                                                                                                                                                                                                                                                                                                                                                                                                                                                                                                                                                                                                                                                                                                                                                                                                                                                                                                       |
| Article Type:                 | Protocol                                                                                                                                                                                                                                                                                                                                                                                                                                                                                                                                                                                                                                                                                                                                                                                                                                                                                                                                                                                                                                                                                                                                                                                                                                                                                                                                                                                                  |
| Date Submitted by the Author: | 19-Feb-2021                                                                                                                                                                                                                                                                                                                                                                                                                                                                                                                                                                                                                                                                                                                                                                                                                                                                                                                                                                                                                                                                                                                                                                                                                                                                                                                                                                                               |
| Complete List of Authors:     | <p>Stock, Sarah; The University of Edinburgh<br/>         Bhide, Amarnath; St George's University of London<br/>         Richardson, Heather; NHS Lothian University Hospitals Division<br/>         Black, Mairead; University of Aberdeen<br/>         Yuill, Cassandra; City University of London<br/>         Harkness, Mairi; University of Stirling<br/>         Reid, Maggie; The University of Edinburgh<br/>         Wee, Fiona; The University of Edinburgh<br/>         Cheyne, Helen; University of Stirling<br/>         McCourt, Christine; City University, City University London<br/>         Rana, Dikshyanta; University of Glasgow, Institute of Health and Wellbeing<br/>         Boyd, Kathleen; University of Glasgow, Health Economics &amp; Health Technology Assessment<br/>         Sanders, Julia; Cardiff University, School of Healthcare Sciences<br/>         Heera, Neelam; Patient and Public Involvement Representative<br/>         Huddleston, Jane; Patient and Public Involvement Representative<br/>         Denison, Fiona; The University of Edinburgh, MRC Centre for Reproductive Health<br/>         Pasupathy, Dharmintra; The University of Sydney<br/>         Modi, Neena; Imperial College London, Medicine<br/>         Smith, Gordon; University of Cambridge, Obstetrics and Gynaecology<br/>         Norrie, John ; The University of Edinburgh</p> |
| Keywords:                     | Maternal medicine < OBSTETRICS, Fetal medicine < OBSTETRICS, OBSTETRICS                                                                                                                                                                                                                                                                                                                                                                                                                                                                                                                                                                                                                                                                                                                                                                                                                                                                                                                                                                                                                                                                                                                                                                                                                                                                                                                                   |
|                               |                                                                                                                                                                                                                                                                                                                                                                                                                                                                                                                                                                                                                                                                                                                                                                                                                                                                                                                                                                                                                                                                                                                                                                                                                                                                                                                                                                                                           |

SCHOLARONE™  
Manuscripts

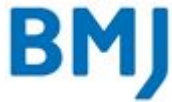

I, the Submitting Author has the right to grant and does grant on behalf of all authors of the Work (as defined in the below author licence), an exclusive licence and/or a non-exclusive licence for contributions from authors who are: i) UK Crown employees; ii) where BMJ has agreed a CC-BY licence shall apply, and/or iii) in accordance with the terms applicable for US Federal Government officers or employees acting as part of their official duties; on a worldwide, perpetual, irrevocable, royalty-free basis to BMJ Publishing Group Ltd ("BMJ") its licensees and where the relevant Journal is co-owned by BMJ to the co-owners of the Journal, to publish the Work in this journal and any other BMJ products and to exploit all rights, as set out in our [licence](#).

The Submitting Author accepts and understands that any supply made under these terms is made by BMJ to the Submitting Author unless you are acting as an employee on behalf of your employer or a postgraduate student of an affiliated institution which is paying any applicable article publishing charge ("APC") for Open Access articles. Where the Submitting Author wishes to make the Work available on an Open Access basis (and intends to pay the relevant APC), the terms of reuse of such Open Access shall be governed by a Creative Commons licence – details of these licences and which [Creative Commons](#) licence will apply to this Work are set out in our licence referred to above.

Other than as permitted in any relevant BMJ Author's Self Archiving Policies, I confirm this Work has not been accepted for publication elsewhere, is not being considered for publication elsewhere and does not duplicate material already published. I confirm all authors consent to publication of this Work and authorise the granting of this licence.

1  
2  
3 **Cervical ripening at home or in-hospital - prospective cohort study and process**  
4  
5 **evaluation (CHOICE) study: Protocol**  
6  
7

8  
9 Sarah J Stock, Usher Institute, University of Edinburgh NINE Edinburgh BioQuarter, 9 Little  
10  
11 France Road, Edinburgh EH16 4UX UK sarah.stock@ed.ac.uk +44 (0)7894629934  
12  
13 (corresponding author) ORCID ID 0000-0003-4308-856X  
14  
15

16  
17  
18 Dr Amarnath Bhide, Consultant Obstetrician, Obstetrics and Gynaecology, St George's  
19  
20 University Hospitals Trust, London, UK. ORCID ID: 0000-3-2393-7501  
21  
22

23  
24  
25 Heather Richardson, Subspecialty Registrar in Maternal and Fetal Medicine, Simpson Centre  
26  
27 for Reproductive Health, NHS Lothian, Edinburgh, UK  
28  
29

30  
31  
32 Dr Mairead Black, Senior Clinical Lecturer, Institute of Applied Health Sciences, University  
33  
34 of Aberdeen, Aberdeen, UK  
35  
36

37  
38  
39 Dr Cassandra Yuill, Research Fellow, Centre for Maternal & Child Health Research  
40  
41 School of Health Sciences, City, University of London, London, UK  
42  
43  
44

45  
46  
47 Dr Mairi Harkness, Nursing, Midwifery and Allied Health Professions Research Unit  
48  
49 (NMAHP), Research Fellow, University of Stirling, Stirling, UK  
50  
51

52  
53  
54 Mrs Maggie Reid, Research Midwife, Usher Institute, University of Edinburgh, Edinburgh,  
55  
56 UK  
57  
58  
59  
60

1  
2  
3 Mrs Fiona Wee, Trial Manager, Usher Institute, University of Edinburgh, Edinburgh, UK  
4  
5  
6

7  
8 Professor Helen Cheyne, Royal College of Midwives Professor of Midwifery, Nursing  
9  
10 Midwifery and Allied Health Professions Research Unit (NMAHP), University of Stirling,  
11  
12 Stirling, UK. ORCID ID: 0000-0001-5738-8390  
13  
14  
15  
16

17  
18 Professor Christine McCourt, Professor of Maternal and Child Health, School of Health  
19  
20 Sciences, City, University of London, London, UK  
21  
22

23  
24 Miss Dikshyanta Rana, Research Assistant, Institute of Health and Well Being, University of  
25  
26 Glasgow, Glasgow, UK  
27  
28  
29

30  
31 Dr Kathleen Boyd, Senior Lecturer, Institute of Health and Well Being, University of  
32  
33 Glasgow, Glasgow, UK  
34  
35  
36

37  
38 Professor Julia Sanders, Professor of Clinical Nursing & Midwifery, School of Healthcare  
39  
40 Sciences, Cardiff University, Cardiff, UK  
41  
42  
43

44  
45 Miss Neelam Heera, Patient and Public Involvement Representative  
46  
47  
48

49  
50 Mrs Jane Huddleston, Patient and Public Involvement Representative  
51  
52  
53

54  
55 Professor Fiona Denison, Reader/Honorary Consultant in Maternal and Fetal Medicine, MRC  
56  
57 Centre for Reproductive Health, University of Edinburgh, Edinburgh, UK  
58  
59  
60

1  
2  
3 Professor Dharmintra Pasupathy, Professor of Maternal Fetal Medicine, Faculty of Medicine  
4 and Health, University of Sydney, Sydney, Australia  
5  
6  
7  
8  
9

10 Professor Neena Modi, Professor of Neonatal Medicine, School of Public Health, Imperial  
11 College London, London, UK  
12  
13  
14  
15  
16

17 Professor Gordon C S Smith, Professor of Obstetrics and Gynaecology, Department of  
18 Obstetrics and Gynaecology, The University of Cambridge, Cambridge, UK  
19  
20  
21  
22  
23

24 Professor John Norrie, Professor of Medical Statistics and Trial Methodology / Director of  
25 Edinburgh Clinical Trials Unit / Co-Head of Centre for Population Health Sciences, Usher  
26 Institute, University of Edinburgh, Edinburgh, UK  
27  
28  
29  
30  
31  
32

33 Word count: 6222  
34  
35

36 Key words: Induction of labour, Prostaglandin, Cervical Ripening Balloon, Pregnancy  
37  
38  
39  
40  
41  
42  
43  
44  
45  
46  
47  
48  
49  
50  
51  
52  
53  
54  
55  
56  
57  
58  
59  
60

## ABSTRACT

### Introduction

The aim of the CHOICE study is to compare home versus in-hospital cervical ripening to determine; whether home cervical ripening is safe (for the primary outcome of neonatal unit [NNU] admission), acceptable to women, and cost-effective from the perspective of both women and the NHS.

### Methods and analysis

We will perform a prospective multicentre observational cohort study with an internal pilot phase. We will obtain data from electronic health records from at least 14 maternity units offering only in-hospital cervical ripening and 12 offering dinoprostone home cervical ripening. We will also conduct a cost-effectiveness analysis and a mixed methods study to evaluate processes and women/partner experiences. Our primary sample size is 8,533 women with singleton pregnancies undergoing induction of labour (IOL) at 39<sup>+0</sup> weeks' gestation or more. To achieve this and contextualise our findings, we will collect data relating to a cohort of approximately 41,000 women undergoing IOL after 37 weeks.

We will use mixed effects logistic regression for the non-inferiority comparison of neonatal unit admission and propensity score matched adjustment to control for treatment indication bias.

The economic analysis will be undertaken from the perspective of the National Health and Personal Social Services (NHS and PSS) and the pregnant woman. It will include a within-study cost-effectiveness analysis and a lifetime cost-utility analysis to account for any long-term impacts of the cervical ripening strategies. Outcomes will be reported as incremental cost

1  
2  
3 per NNU admission avoided and incremental cost per quality adjusted life year (QALY)  
4  
5 gained.  
6  
7

## 8 9 **Research Ethics approval and Dissemination**

10  
11  
12 CHOICE has been funded and approved by the National Institute of Healthcare Research  
13  
14 Health Technology and Assessment (NIHR HTA), and the results will be disseminated via  
15  
16 publication in peer reviewed journals.  
17  
18

## 19 20 **ARTICLE SUMMARY**

### 21 22 23 **Strengths and limitations of this study**

- 24  
25 ● This is a large study to evaluate the safety of at-home cervical ripening
- 26  
27 ● We will set up a platform for data collection using electronic health records to enable  
28  
29 future research into rare safety outcomes
- 30  
31 ● The study includes assessment of women's views and experiences using validated  
32  
33 questionnaires as well as qualitative methods.
- 34  
35 ● Observational design of the study makes it vulnerable to residual confounding.  
36  
37  
38  
39  
40  
41  
42  
43  
44  
45  
46  
47  
48  
49  
50  
51  
52  
53  
54  
55  
56  
57  
58  
59  
60



## INTRODUCTION

Induction of labour (IOL) is the most common obstetric intervention offered to women when risks of continuing the pregnancy are thought to outweigh risks of birth. Increases in IOL rates over the past 10 years mean that now 29.6% of all pregnant women in the UK have their labour induced.(1) IOL at term, when compared to expectant management of pregnancy, reduces caesarean birth, maternal hypertensive disease and complications,(2) as well as being associated with a reduction in perinatal mortality.(3, 4) The demands on maternity services are increasing to accommodate increasing rates of IOL.(5) Although IOL (compared to expectant management) reduces overall hospital stay, it increases the time on labour and delivery wards,(2) having a major impact on resources, staffing, and negatively impacts on women's experience of labour.(6-8)

Cervical ripening is a key component of IOL.(9) It may initiate labour, but is often followed by artificial rupture of membranes +/- intravenous oxytocin infusion. NICE guidance(10) recommends pre-induction cervical ripening in all women having IOL unless there is a contraindication.

Traditionally cervical ripening has been performed entirely in-hospital, to allow monitoring of maternal/fetal wellbeing and early recognition of complications.(11) However, an increasing number of UK maternity units offer outpatient (home) cervical ripening. As the rate of IOL is increasing, home cervical ripening may provide opportunities to reduce the burden on the NHS, for example, by reducing hospital stay during IOL. However, the safety and acceptability of home cervical ripening have not been fully evaluated. NICE(10) identified the need to assess the safety, efficacy and clinical and cost-effectiveness of outpatient and inpatient IOL in the UK setting, taking into account women's views. A recent Cochrane review found insufficient evidence to draw conclusions on the efficacy, safety and cost-effectiveness of home-induction

1  
2  
3 of labour and indicated that large prospective cohort studies would be needed.(12) Maternity  
4 service users have identified IOL as an important research topic,(13) and women have reported  
5 specific negative experiences such as increased pain and anxiety and lack of support which  
6 may be alleviated by home cervical ripening.(8) Potential NHS cost savings of home cervical  
7 ripening could be offset by increased costs of any additional morbidity resulting from home  
8 cervical ripening, costs to parents may be increased, and acceptability of home cervical  
9 ripening is unknown. Health services need to balance the full resource impact of IOL with the  
10 need to provide safe and acceptable care.  
11  
12  
13  
14  
15  
16  
17  
18  
19  
20  
21

22  
23 In the cervical ripening at home or in-hospital – prospective cohort study and process  
24 evaluation (CHOICE) study, we will perform an observational cohort study with a cost-  
25 effectiveness analysis and process evaluation to address the question “Is it safe, effective, cost-  
26 effective and acceptable to women to carry out home cervical ripening during IOL?” These  
27 analyses will provide information to help women and their caregivers make informed decisions  
28 around how to have IOL.  
29  
30  
31  
32  
33  
34  
35  
36  
37

38 Our main aim is to compare the setting of cervical ripening at home versus in-hospital. As the  
39 NICE recommended agent for cervical ripening is vaginal prostaglandin, our primary  
40 comparison will be home dinoprostone versus in-hospital dinoprostone. In order to future-proof  
41 the study, we will include a secondary comparison: home cervical ripening with balloon  
42 catheter versus home cervical ripening with dinoprostone. By including two different methods  
43 of home cervical ripening within our study, we will provide initial comparative evidence on  
44 these two methods of home labour induction.  
45  
46  
47  
48  
49  
50  
51  
52  
53  
54  
55  
56  
57  
58  
59  
60

## METHODS AND ANALYSIS

### CHOICE Prospective Cohort study

#### Study design and setting

We will carry out a prospective multicentre cohort study using de-identified clinical data from electronic hospital records. The primary outcome will be non-inferiority of NNU/special care admission for 48 hours or longer, initiated within 48 hours of birth.

The study will be performed in at least 26 UK obstetric units, 14 of which offer exclusively in-hospital cervical ripening and 12 offer dinoprostone cervical ripening both in-hospital and at home.

Participating maternity units will be purposively selected to represent the diverse range of maternity service settings in the UK, and include urban tertiary referral units, mid-sized urban district general hospitals and small, more isolated, rural units.

#### Data sources

Data will be collected directly from electronic maternity (and neonatal) records for participants who had babies admitted to a neonatal unit. These data are recorded by clinical staff (midwives, doctors and neonatal nurses) during the course of antenatal, intrapartum and postpartum care. Existing data fields, supplemented by new bespoke, data entry fields enabled in the maternity dataset at participating sites will be used. Unless women opt-out of secondary data use (from similar studies we estimate <1% will opt out), de-identified data will be transferred from participating sites to a secure University of Edinburgh server for analysis.

1  
2  
3 No personal data will be collected. Potentially identifiable data, such as the date and time of  
4 birth, date of events such as commencing cervical ripening, hospital discharge, will be  
5 converted into gestation at birth (weeks + days); and antenatal and postnatal events into “t-x”  
6 and “t+x” hours and days respectively.  
7  
8  
9  
10  
11  
12

### 13 Population, inclusion and exclusion criteria

14  
15  
16  
17 We will initially apply broad inclusion criteria and collect data from all women having IOL at  
18 37<sup>+0</sup> weeks gestation or more to create a cohort for analyses. Women who have opted out of  
19 data provision will be excluded.  
20  
21  
22  
23

24  
25 We will then apply more stringent inclusion and exclusion criteria at the analysis stage for a  
26 suite of nested analyses. In our primary analysis, we will create a cohort of women with  
27 “uncomplicated” (ie those with no identified risk factors for adverse maternal or perinatal  
28 outcomes defined below) pregnancies in whom there was no contraindication to home  
29 cervical ripening, who had singleton pregnancies with IOL at 39 weeks gestation or more.  
30  
31  
32  
33

34 This group will include women having IOL for post-dates, but also women having IOL  
35 because of maternal or clinician preference, IOL for maternal age, IOL for discomfort or  
36 social indications. Exclusion criteria will consist of grand multiparity (6 or more previous  
37 births), previous caesarean section, antepartum stillbirth (before cervical ripening initiated),  
38 Class III obesity at booking (BMI 40 kg/m<sup>2</sup> or more), Prelabour rupture of membranes  
39 (ROM) documented as primary or other indication for IOL (prolonged ROM; Spontaneous  
40 ROM; Suspected Spontaneous ROM), Maternal or fetal condition that would or could  
41 preclude home cervical ripening documented as primary or other indication for IOL  
42 (Maternal conditions: proteinuria; hypertension; antepartum haemorrhage; diabetes; obstetric  
43 cholestasis; past obstetric history; pre-eclampsia; PIH/PET (not defined); PIH; PET;  
44 thrombophilia. Fetal conditions: oligohydramnios; reduced liquor volume; macrosomia;  
45  
46  
47  
48  
49  
50  
51  
52  
53  
54  
55  
56  
57  
58  
59  
60

1  
2  
3 intrauterine growth restriction (IUGR); static growth; congenital fetal anomaly;  
4  
5 polyhydramnios; abnormal CTG/Doppler; breech; reduced fetal movements; termination of  
6  
7 pregnancy for fetal anomaly).  
8  
9

10  
11 We will explore the potential for additional analyses which may include IOL for other  
12  
13 indications (e.g. reduced fetal movements) or in other populations (e.g. multiple pregnancies;  
14  
15 women with a previous caesarean birth). However, in general, home cervical ripening is only  
16  
17 offered to 'low risk' women, so we anticipate that numbers of higher risk women having home  
18  
19 IOL may not be high enough for meaningful analyses.  
20  
21  
22

### 23 Exposure and Outcomes

24  
25  
26  
27 Our primary aim is to compare home versus in-hospital cervical ripening. We will collect data  
28  
29 at individual-level. The exposure group will be women who, at the start of the cervical ripening  
30  
31 process, plan to have home cervical ripening. The comparator group will be women who  
32  
33 planned to have in-hospital cervical ripening from maternity units not offering home cervical  
34  
35 ripening. This will minimise potential bias arising from the fact that, in maternity units which  
36  
37 offer both home and in-hospital cervical ripening, the risk of complications in the babies of  
38  
39 women having home cervical ripening (lower risk pregnancies) is inherently different to that  
40  
41 of babies of women having in-hospital cervical ripening (higher risk pregnancies).  
42  
43  
44  
45

46  
47 As the NICE recommended agent for cervical ripening is vaginal prostaglandin, our primary  
48  
49 comparison will be home dinoprostone versus in-hospital dinoprostone. Dinoprostone is now  
50  
51 most commonly administered as 10mg slow-release pessary (Propess, Ferring) which stays in  
52  
53 place for 24 hours. We will use this formulation in our primary comparison.  
54  
55  
56

57 We will include a secondary exploratory comparison - home cervical ripening with balloon  
58  
59 catheter (exposure) versus home cervical ripening with dinoprostone (comparator), to explore  
60

1  
2  
3 if there are any indications of different safety profiles of these two methods of home cervical  
4  
5 ripening.  
6  
7

8  
9 Our proposed primary outcome will be admission to a NNU/Special care baby unit for 48 hours  
10  
11 or longer, initiated within 48 hours of birth. NNU admission is a marker of neonatal morbidity  
12  
13 and is the leading core outcome defined for studies of IOL.(14) Any increase in NNU admission  
14  
15 of term babies is undesirable due to the separation of mother and baby. However, NNU  
16  
17 admission rates are highly variable between maternity units and are likely to depend on local  
18  
19 policies and culture. We therefore, plan to use a primary outcome which represents more severe  
20  
21 neonatal morbidity (admission to a NNU within 48 h of birth for 48 h or longer) which is less  
22  
23 likely to be influenced by site-specific factors. We may re-define the parameters of NNU  
24  
25 admission used in the primary outcome after analysis of pilot data (see section on 'Pilot phase').  
26  
27  
28  
29

30  
31 We have prespecified a number of secondary outcomes to assess the safety of home cervical  
32  
33 ripening with respect to neonatal and maternal morbidity, shown in Table 1. These include  
34  
35 outcomes from a core outcome set for studies of IOL.(14) We will also include secondary  
36  
37 outcomes relating to the effectiveness of home cervical ripening, to explore whether the  
38  
39 setting of cervical ripening influences subsequent labour and birth. Mother and baby  
40  
41 outcomes were suggested by our lay consultation as important to include. We will use  
42  
43 birthweight, birthweight centile, small for gestational age and large for gestational age as  
44  
45 parameters to check the validity of our matching procedures in analyses. Birthweight is an  
46  
47 objective outcome that may represent pregnancy complications, but extremely unlikely to be  
48  
49 affected by the setting of cervical ripening. Comparison of birthweights between groups  
50  
51 should provide reassurance that we have minimised systemic bias in our analyses.  
52  
53  
54  
55  
56  
57  
58  
59  
60

## Statistical analysis

All analyses will be fully specified in a comprehensive Statistical Analysis Plan and agreed by the Steering Committee. Analyses will be carried out in accordance with relevant guidance including RECORD(15) and STROBE.(16)

We will include at least 14 maternity units offering only in-hospital cervical ripening and 12 offering dinoprostone home cervical ripening (~95,000 deliveries per annum). We will invite additional maternity units to opt in to data provision, to allow contingency in case of ‘cross overs’ due to sites changing their IOL protocols during the study period.

We considered a superiority design for CHOICE, but decided against it because i) safety is a key concern to both clinicians and women, and was specified as the important outcome in the commissioning brief; ii) it is not plausible to hypothesise that home cervical ripening (intervention) is safer than in-hospital cervical ripening (comparator – the standard of care); and iii) it is not ethical to use a superiority design to test an intervention which may be worse (in terms of safety) than the established standard. Therefore, a non-inferiority design was chosen with a non-inferiority margin of 4% (deemed as likely to be an important difference on consultation with women and clinicians) for the primary outcome of neonatal unit admission.

Establishing the appropriate non-inferiority margin was complicated by recognition that the dimensions that are hypothesised to show benefit, i.e. acceptability to women and partners, and a reduction in costs appeal to different audiences – women will be primarily interested in acceptability and largely indifferent to costs (in a free at point of care NHS), whereas the potential reduction in costs will likely be the primary focus for the healthcare provider. We were also conscious that due to the inflation of the sample size due to (a) clustering; (b) losses due to non-matching in the propensity analysis and (c) loss to follow up, the sample size for a

1  
2  
3 smaller non-inferiority margin would quickly become not feasible within a realistic budget and  
4  
5 timeframe. However, given that, regardless of a superiority or non-inferiority design, any  
6  
7 specific sample size will estimate the treatment effect to a certain level of precision (e.g. the  
8  
9 width of a 95% confidence interval), we are confident that our final comparison group of 1,920  
10  
11 in each arm (with ~ 115 NNU admissions in each arm [see sample size calculation below]), we  
12  
13 will generate sufficient high-quality evidence to definitively answer the questions around  
14  
15 safety, effectiveness, acceptability, and cost-effectiveness for this important question  
16  
17  
18  
19

20 For the principal analysis of the primary outcome, we will use mixed effects logistic regression  
21  
22 for the non-inferiority comparison of NNU admission within 48 hours of birth for 48 hours or  
23  
24 longer (Yes/No). As sensitivity analyses to demonstrate that the estimated treatment effects are  
25  
26 robust to the chosen method, we will also explore propensity score weighting (PSW by inverse  
27  
28 probability of receiving specified treatment) and single-stage regression, without using any  
29  
30 propensity scoring, adjusting directly for the baseline factors relevant for treatment indication.  
31  
32 We will also use propensity score matched (PSM) adjustment to control for treatment  
33  
34 indication bias. The logistic model underlying the PSM will include variables such as age,  
35  
36 Bishop's score, previous vaginal birth, co-morbidities, and relevant hospital-level factors, with  
37  
38 1:1 matching. Potential confounding variables will be identified before the start of the analysis,  
39  
40 and these will be finalised after exploration of the data at the pilot stage, through the creation  
41  
42 of directed acyclical graphs.  
43  
44  
45  
46  
47  
48

49 Similar analyses will be used for analyses of secondary outcomes, using logistic, linear,  
50  
51 negative binomial, and time-to-event regressions. For example, we will analyse the duration of  
52  
53 hospital stay during IOL, time spent at home, total hospital stay, and time to birth using linear  
54  
55 models; while birth outwith hospital and breastfeeding will be analysed using logistic  
56  
57 regression; and mode of birth using multinomial logistic regression.  
58  
59  
60



1  
2  
3 For the remaining maternal secondary outcomes, we will include hyperstimulation,  $\geq 1$   
4 induction agent, oxytocin use for induction or augmentation, maternal ICU/HDU admission,  
5  
6 haemorrhage, uterine rupture, pulmonary embolus, and cardio-respiratory arrest. For the  
7  
8 neonatal secondary outcomes, we will include meconium aspiration syndrome, respiratory  
9  
10 support, neonatal infection, umbilical cord prolapse, neonatal birth trauma, neonatal  
11  
12 encephalopathy (Grade II/III), therapeutic hypothermia and neonatal death. Logistic regression  
13  
14 and Poisson or negative binomial regression, possibly inflated for excess zeros will be used as  
15  
16 appropriate. For outcomes with a small number of events, we will use the appropriate exact  
17  
18 regression procedure. As per the primary outcome, we will assess the influence of missing data  
19  
20 for secondary outcomes using appropriate sensitivity-type analyses. We recognise that there  
21  
22 are many secondary outcomes being analysed, as per the recommended core outcome set (17).  
23  
24 We do not propose to make any formal statistical adjustment for the multiple comparisons.  
25  
26 However, a caveat will be clearly expressed regarding the possibility of type 1 statistical error,  
27  
28 given the multiple comparisons made. We will consider the following subgroup analyses, based  
29  
30 on sufficient numbers to allow meaningful analyses: 1) nulliparous and parous women; 2)  
31  
32 indication for IOL (post-dates IOL; maternal or clinician preference; maternal age; discomfort  
33  
34 or social indication)

35  
36 We propose the following sensitivity analyses. 1) Within-site comparison of home versus in-  
37  
38 hospital cervical ripening (restricted to sites that offer home cervical ripening) 2) Per protocol  
39  
40 analysis (women who actually are discharged home after commencing cervical ripening) 3)  
41  
42 Complete case analysis to assess the effect of any strategies to deal with missing data.  
43  
44

45  
46 Data from the larger cohort of women having IOL at 37<sup>+0</sup> weeks' gestation or more, will be  
47  
48 used to contextualise our findings on the background of unit practices and populations  
49  
50 undergoing IOL. There is considerable inter-unit variation in both the rates of IOL and the risk  
51  
52  
53  
54  
55  
56  
57  
58  
59  
60

1  
2  
3 profile of women giving birth, that need to be considered. It will also allow us to capture any  
4  
5 changes in practice over the study period regarding criteria for eligibility for home cervical  
6  
7 ripening and change in method of IOL. This will help ensure the generalisability of our  
8  
9 findings.  
10  
11  
12

13 Future long-term outcome evaluation will be possible through data linkage to Hospital Episode  
14  
15 Statistics and Scottish Morbidity Records.  
16  
17

### 18 19 Missing data 20 21

22  
23 We anticipate missing data, but estimate that no more than 10% of women will have missing  
24  
25 usable data on primary outcome, eligibility, setting of cervical ripening and/or have some part  
26  
27 of the baseline data (age, co-morbidities, and any relevant identified hospital-level factors). We  
28  
29 will use evidence-based strategies to minimise any such losses and recover any missing data  
30  
31 that is possible. We will monitor levels of missing data as the study progresses, identifying any  
32  
33 outcomes or exposures and/or sites that are prone to missingness, and take corrective action  
34  
35 (e.g. additional feedback and support). We will conduct appropriate sensitivity type analyses,  
36  
37 for example, using a multiple imputation approach assuming data are missing at random; and,  
38  
39 if the data warrant (for example, if there is differential missingness between the in-hospital and  
40  
41 at-home cohorts) non-ignorable (informative) missing data generating mechanisms.  
42  
43  
44  
45

46  
47 We will also conduct an exploratory analysis comparing the two methods of home IOL, i.e.  
48  
49 dinoprostone vs. mechanical methods. We will use the same methods as outlined above for the  
50  
51 primary and secondary outcomes in the overall analysis.  
52  
53  
54  
55  
56  
57  
58  
59  
60

### Sample size

The sample size is based on our principal analysis (women with singleton pregnancies having IOL at 39 weeks gestation or more) and primary comparison (home cervical ripening vs in-hospital cervical ripening with dinoprostone), estimated 6% NNU admission rate (1) for babies born to mothers having IOL at >39 weeks gestation with no more than 4% excess NNU admission rate (from 6%), at 90% power, 2.5% 1-sided alpha, and an estimated ICC of 0.01. We will require 160 women in each of 12 sites (clusters) with uncomplicated pregnancies at 39 weeks or more undergoing IOL (total 1,920 in each arm). To account for the fact that i) only around 50% of women eligible for home cervical ripening in the intervention arm will actually initiate home cervical ripening, and ii) a larger pool of women is required in the control arm to allow for propensity score matching, our required sample size is  $1,920 * 2$  (number of arms) /  $0.5$  (numbers of women actually starting home cervical ripening and matching) /  $0.9$  (for missing data), giving an overall required sample size of 8,533.

Based on an estimate that 22% of all maternities have IOL at 39 weeks or more(1) and that ~29% of these would be eligible for participation in our principal analysis (from scoping data from potential participating sites), and, in home cervical ripening sites ~50% of these will take up home cervical ripening, we anticipate achieving our recruitment targets within 20 months.

Current data from the NMPA for 2019 suggests that the national average rate of IOL after 37 weeks is 29.6%.(1) As our proposed participating units have about 90,000 births per annum, we anticipate collecting data on approximately 41,000 women having IOL at 37 weeks gestation or more.

## Participant identification and opt out

Participants will be identified from data recorded in specified fields in electronic maternity records. We will use data fields indicating IOL, estimated due date (EDD) and date of IOL to identify women having IOL at 37 weeks gestation or more.

Women will be made aware of the CHOICE study through posters in participating sites; business cards; information leaflets; online adverts on hospital/maternity websites and relevant social media sites; and information in maternal electronic maternity records.

Women will be able to opt out of data provision by notifying their clinician or midwife, or emailing the study research midwife at the local site, and it will be recorded on their electronic record. There will be no restriction on co-enrolment in other studies.

## Pilot phase

We propose a pilot phase to determine the parameters of the primary outcome and feasibility of obtaining the required sample size for analysis. This is based on the evaluable comparison group of 1,920 women in each arm, so acts as an inherent check on home cervical ripening eligibility and uptake rates, the assumed level of missingness and attrition due to non-matching.

We will assess variation of the primary outcome at the pilot stage; along with that of other measures of neonatal morbidity included as secondary outcomes (e.g. any NNU admission, NICU admission). We may redefine the parameters of NNU admission used in the primary outcome after analysis of pilot data, choosing the one with the lowest ICC, or the one representing the least severe outcome which has an ICC of 0.01 or less. This decision will be made in consultation between the expert project management group, the trial steering committee (TSC) and the funder.

### CHOICE Health Economic Analyses

Health economic analysis will be specified in a health economic analysis plan and reported in line with CHEERS guidelines.(18)

Economic analyses will explore the cost-effectiveness of at home versus inpatient cervical ripening for women undergoing IOL. Two separate cost-effectiveness questions will be addressed: (i) home cervical ripening with dinoprostone compared to in-hospital cervical ripening with dinoprostone and (ii) home cervical ripening with balloon catheter compared to home cervical ripening with dinoprostone. The evaluation will involve within study cost-effectiveness analysis and a lifetime cost-utility analysis to account for any long-term impacts (cost and morbidity) of the alternative cervical ripening strategies. Resource use data will be obtained from the prospective multicentre observational cohort study using data obtained from the maternity information system, Badgernet Maternity and National Neonatal Research Database (NNRD) data.

Costs incurred by women and their families relating to IOL are relevant from the patient perspective and potentially important for the 'at-home' cervical ripening strategy. These data are not available from the observational datasets, and therefore tailored economic-related questions have been incorporated into a process evaluation survey described in section 5 below.

To account for bias in the observational data, methods such as multivariate regression and propensity scoring will be employed as recommended in guidelines for cost-effectiveness analysis based on observational data,(19,20) which is consistent with the main study statistical analyses for this study. To capture any cost and morbidity events incurred in the neonatal period, the within-study analysis will include the primary study endpoint (NNU admission within 48 hours of birth for 48 hours or more) up to one-month post-birth. Outcomes will be

1  
2  
3 reported as the incremental cost per NNU admission avoided (in line with primary study  
4 outcome) as well as incremental cost per birth up to 28 days post-birth.  
5  
6  
7

8  
9 The lifetime analysis will account for longer term costs, quality of life, morbidity and disability  
10 from both the NHS & PSS and patient perspective and will report outcomes in terms of  
11 incremental cost per Quality Adjusted Life Years (QALYs) gained.  
12  
13  
14  
15

### 16 17 **Qualitative (q)CHOICE Process evaluation**

18  
19  
20 The process evaluation, nested within the observational cohort study, will comprise of a  
21 questionnaire-based survey in at least 12 sites and five case studies. Both qualitative and  
22 quantitative data will be collected, specifically a women's experience questionnaire, semi-  
23 structured interviews with women and birth partners, audio recordings of clinician/women  
24 consultations, interviews and focus-group discussions with professionals. Figure 1 describes  
25 the initial process evaluation logic model hypothesising the chain linking interventions and  
26 outcomes. This will inform data collection and analysis. At the final stage of data analysis, we  
27 will share and discuss emerging findings with a group of service users to develop a revised  
28 logic model and explanatory framework.  
29  
30  
31  
32  
33  
34  
35  
36  
37  
38  
39  
40  
41

#### 42 Questionnaire-based survey

43  
44  
45 Questionnaire data collection will take place over a four- to six-month period early in the study.  
46  
47 CHOICE participating sites who use electronic maternity records accessible by women (the  
48 electronic equivalent of maternity hand-held records), will be invited to contribute to this part  
49 of the study. Women who have IOL at 39 weeks or more will receive a 'push or SMS  
50 notification' directing them to online study information when IOL is booked and a second  
51 notification around 10 days after they give birth. This will provide a link to the participant  
52 information sheets, consent form and online survey.  
53  
54  
55  
56  
57  
58  
59  
60

1  
2  
3 Push notifications are used by maternity services to prompt women to read information  
4 relating to their maternity care, including information within their electronic record. Women  
5 are able to opt out of SMS and push notifications, but routine monitoring of women's use of  
6 their online record shows that a sufficient number of women use notifications and continue to  
7 access their record postnatally, thus enabling a broad sample to be reached.  
8  
9

10  
11  
12 The survey landing page will include a summary of qCHOICE and links to the information  
13 sheets before directing women to the consent questions, which they are asked to complete  
14 before completing the survey. A telephone number will be supplied for women to call if they  
15 have any questions about the survey, or to request a postal survey if preferred. Surveys will be  
16 submitted online via Online Surveys,(21) by post or completed by phone with a member of the  
17 study team, with the support of an interpreter if needed. Participant contact details provided  
18 by survey respondents who are happy to be contacted further about a possible interview will  
19 be on a detachable back sheet of the questionnaire or a separate online page. Respondents will  
20 be informed that a £10 voucher will be offered to interview participants and that (with their  
21 consent) their birth partners may take part in an interview.  
22  
23  
24  
25  
26  
27  
28  
29  
30  
31  
32  
33  
34  
35  
36  
37  
38  
39

40 The survey will comprise validated tools as well as questions relating to service user costs, and  
41 the process of IOL as follows:  
42  
43  
44

45 1. The Labour Agency Scale (short form).(22) The LAS is a well-established, validated  
46 measure of women's experience during labour and birth. The short form LAS includes 10  
47 items with a 7-point Likert type response. It measures perceived control during labour, which  
48 is the woman's sense of mastery over internal and environmental factors and is highly  
49 correlated with satisfaction with care. The LAS will be the primary outcome.  
50  
51  
52  
53  
54  
55  
56  
57  
58  
59  
60

1  
2  
3 2. A modified version of the IOL satisfaction questionnaire(23) tested in the PROBIT-F trial.

4  
5 This questionnaire focuses specifically on women's experiences of aspects of IOL including  
6  
7 information, anxiety and physical and emotional discomfort.  
8  
9

10  
11 3. The short form Warwick-Edinburgh mental wellbeing scale WEMWBS.(24) A seven-item  
12  
13 scale that measures mental wellbeing (as opposed to mental illness or disorder) representing  
14  
15 positive attributes of wellbeing including feeling and functioning.  
16  
17

18  
19 4. Additional questions which will inform the economic analysis from the woman's perspective  
20  
21 will cover resource use and expenditures of cervical ripening for women including number of  
22  
23 returns and phone calls to hospital, time distance, mode of travel to and from hospital, partner  
24  
25 role, additional expenditure on maternity items and medication while at home, and additional  
26  
27 childcare expenditure (if any) while at home.  
28  
29

30  
31 5. The survey will include demographic questions, questions about the process of IOL,  
32  
33 questions relating to the impact of COVID 19 on their experience of IOL, a question asking  
34  
35 women if they would be willing to be contacted regarding possible participation in a semi-  
36  
37 structured interview and for permission for data linkage to the observational cohort study.  
38  
39

40  
41  
42 Survey data will be analysed using descriptive and inferential statistics. Descriptive statistics  
43  
44 with 95% confidence intervals will be reported for the total sample (by planned mode of  
45  
46 cervical ripening – home or hospital, by actual mode (as some women who plan one mode may  
47  
48 in practice have a different mode) and by study site. We will examine whether there are  
49  
50 statistically significant differences in the primary outcome of sense of control (labour agency)  
51  
52 and by psychosocial outcome of postnatal psychological wellbeing score (WEMWBS) between  
53  
54 women with home cervical ripening and women with in-hospital ripening. The covariates will  
55  
56  
57  
58  
59  
60



1  
2  
3 include the reason for IOL, gestational age, maternal age, parity, sociodemographic status,  
4  
5 ethnic group.  
6  
7

8  
9 The sample size required to compare the experiences of women who had home and hospital  
10  
11 cervical ripening is estimated to be 46 subjects within each of 12 sites (assuming equal numbers  
12  
13 within each site) i.e. 552 women in total. This is based on use of LAS(25) where a change of  
14  
15 5.5 points is considered clinically meaningful. In an individually randomised study, to have  
16  
17 90% power at a 5% level of significance to detect an effect size of 0.5 (two-sided) we would  
18  
19 need 85 evaluable subjects per arm (170 total). However, this has to be inflated for the  
20  
21 clustering within each site. We assume that the intraclass correlation coefficient is 0.05 in this  
22  
23 setting. We will also inflate the target sample by 10% to account for incomplete data/ unusable  
24  
25 questionnaires, aiming for 613 women in total.  
26  
27  
28

29  
30 We will invite all sites using accessible electronic maternity records to participate in the survey;  
31  
32 but with the option to opt out. We will include at least 12 sites, i.e. a total of at least 43,200  
33  
34 births annually across the sites. Our previous experience of questionnaire-based surveys, and  
35  
36 the UK's national maternity experience suggest a response rate of 40%. With an estimated  
37  
38 eligibility of 22% of all maternities having IOL at 39 weeks or more, and 15% of these having  
39  
40 home cervical ripening. We expect to achieve our sample size within four months and will  
41  
42 monitor recruitment rates from each site and if necessary extend the survey period to ensure an  
43  
44 adequate sample.  
45  
46  
47  
48

#### 49 50 Case studies

51  
52  
53 In-depth case studies will be undertaken at five sites. The sample of five case studies is  
54  
55 pragmatic, and selection is designed to balance depth with breadth of information and analysis  
56  
57 with sites chosen to provide diversity and balance of service types on the basis of geography,  
58  
59  
60

1  
2  
3 service configuration and approaches to provision of IOL. We will undertake semi-structured  
4 interviews with women, their partners and a range of staff and stakeholders in each site. A topic  
5 guide and pathway mapping will be used to help focus the discussion. Interviews will explore  
6 perceptions and experiences of the service approach to induction and implementation of local  
7 cervical ripening protocols in practice.  
8  
9  
10  
11  
12  
13

#### 14 15 16 *Women and partner interviews* 17

18  
19 Women will be eligible for interview if they have IOL at a gestation of 39<sup>+0</sup> weeks gestation  
20 or more, have given birth in one of the case study sites and responded to the survey indicating  
21 a willingness to be contacted regarding the interview.  
22  
23  
24  
25

26  
27 A purposive sample of women will be included. A sampling frame will be constructed within  
28 and across case study sites with the aim of including a balance of nulliparous and parous  
29 women, women who were offered outpatient cervical ripening but declined, women who  
30 experienced this and women who were not offered it. The women approached will be given the  
31 opportunity to ask further questions and at least one week to decide whether to participate in  
32 an interview. Interviews will be conducted online or by telephone using a verbal consent  
33 protocol prior to the start of the interview. All women who consent to participate in an interview  
34 will also be asked whether they give consent for their birth partner to be invited for an  
35 interview. We anticipate interviewing between 10-15 women in each site (total 50-75  
36 participants) and, assuming that around half of participants may have a birth partner willing to  
37 participate, we anticipate including around 25-38 birth partners. If couples express a preference  
38 to be interviewed together, this will be accommodated. 'Birth partner' will be defined by the  
39 women themselves.  
40  
41  
42  
43  
44  
45  
46  
47  
48  
49  
50  
51  
52  
53  
54  
55  
56  
57  
58  
59  
60

1  
2  
3 *Key professionals, stakeholders and maternity professionals' interviews and focus groups*  
4  
5  
6

7 Key professionals and stakeholders for interviews will be identified with the support of the PI  
8 for each local case study service but will typically include: head of midwifery, clinical director,  
9 consultant obstetricians and midwives, chairs of local Maternity Voices Partnerships,  
10 representatives from local maternity service user groups and service commissioners or health  
11 board leads. Interviews will be conducted online or by telephone. Verbal consent will be  
12 obtained at the start of the interview. We anticipate undertaking around 10 individual  
13 interviews in each case study site.  
14  
15  
16  
17  
18  
19  
20  
21  
22  
23

24 Midwives and obstetricians will be invited to participate in focus group discussions and we  
25 estimate that three focus groups comprising of six to eight participants (total 18-24 participants)  
26 will be held in each site. These will be organised to facilitate participation of a diversity of  
27 maternity professionals, by including in a local audit meeting or study day. Focus groups may  
28 be held online or in person if access to the case study site is possible.  
29  
30  
31  
32  
33  
34  
35  
36

37 *Observations of maternity visits discussing IOL*  
38  
39

40 A small convenience sample of maternity visits will be included in each case study site in order  
41 to enable analysis of information provision and women's information needs. Up to five  
42 maternity professionals in each site will be provided with a digital recorder and given  
43 instructions on use and asked to record three consecutive interviews with the woman's consent.  
44  
45  
46  
47  
48  
49 We will follow up the recorded consultations with a brief (up to ten minute) telephone interview  
50 to explore the woman's understanding of the information provided.  
51  
52  
53  
54  
55  
56  
57  
58  
59  
60

### *Qualitative data analysis*

All qualitative data will be transcribed and entered into the analysis support software NVivo to support data management and analysis. Documentary sources will be added to the NVivo project file as PDF files. Visual approaches will be used to support the discussion and analysis of the pathways. Recordings of discussions will be analysed using a structured approach to conversation analysis. Interviews with women, partners and health professionals will be transcribed and analysed using a thematic framework approach, based on frameworks developed in recent work by the study team as part of the PROBIT-F trial (8, 26).

### **RESEARCH ETHICS APPROVAL AND DISSEMINATION**

CHOICE has National Research Ethics Service Committee approval (York and Humber - Sheffield Research Ethics Committee, REC reference: 20/YH/0145), National R&D approval in Scotland (NHS Research Scotland Permissions) and England (Health Research Authority), and approval from the Public Benefit and Privacy Panel (PBPP) in Scotland is pending. The study will be conducted in accordance with the principles of the International Conference on Harmonisation Tripartite Guideline for Good Clinical Practice (ICH GCP).

CHOICE is registered on the ISRCTN registry (ISRCTN32652461)

Results will be submitted for peer reviewed academic publication and presented at international conferences. Meta-data produced in this study will also become available to Health Data Research UK (HDRUK) Gateway. Strengthening the Reporting of Observational Studies in Epidemiology (STROBE) guidance(16) and Reporting of studies Conducted using Observational Routinely-collected Data (RECORD) guidance(15) will be used to guide transparent reporting.

## **AUTHOR CONTRIBUTIONS**

SJS, GS, JS and DP contributed to the conception of the study. All authors contributed to the study design. All authors contributed to drafting the protocol. SJS, HR and FW drafted the first version of the manuscript. All authors revised the manuscript for important intellectual content. All authors gave final approval of the version to be published

## **PATIENT AND PUBLIC INVOLVEMENT**

There are two PPI co-applicants on the study grant who have contributed to the protocol, study design and patient facing materials. A CHOICE Parent Advisory Group (PAG) has been established to provide further support and guidance on study materials and management.

## **ACKNOWLEDGMENTS**

We gratefully acknowledge the help of the following people:

Trial Steering Committee: Dr Brenda Kelly (Chair), Dr Sarah Stock, Fiona Fraser, Jaqueline Birks, Dr Tracey Mills, Dr Kate Walker, Fiona Wee.

The West Midlands NIHR Clinical Research Network, who are the lead network for the study in England, and are providing support with site feasibility and set up.

Clevermed Ltd, provider of BadgerNet maternity records system, who are providing technical expertise and facilitating data extracts from approved sites.

The Edinburgh Clinical Trials Unit (ECTU), who are providing trial management, data management and statistical support.

1  
2  
3 Delivered Social, who kindly created and donated the CHOICE study website completely  
4  
5 free of charge as part of their social impact programme; Delivered Social Green.  
6  
7

## 8 9 **FUNDING**

10  
11  
12 CHOICE is funded by the National Institute of Healthcare Research Health Technology and  
13  
14 Assessment (NIHR HTA) NIHR 127569. The views expressed are those of the authors and  
15  
16 not necessarily those of the NIHR or the Department of Health and Social Care.  
17  
18

19  
20 SJS is supported by Wellcome Trust (209560/Z/17/Z)  
21  
22

## 23 24 **COMPETING INTERESTS**

25  
26  
27 SS reports grants from NIHR, grants from Wellcome Trust, grants from Tommy's Charity,  
28  
29 grants from MRC, during the conduct of the study.  
30  
31

32  
33 AB reports a grant from UK National Institute of Health Research, Research for patient  
34  
35 benefit program (NIHR RfPB) for Trans-cervical balloon catheter and its comparison to  
36  
37 sustained release prostaglandin use for out-patient induction of labour in low-risk women: A  
38  
39 feasibility study for a randomised controlled trial. (PB-PG-0815-20022), outside the  
40  
41 submitted work.  
42  
43

44  
45 MR is an employee of Clevermed Ltd.  
46  
47

48  
49 KB reports a grant from the NIHR during conduct of study  
50

51  
52 JS reports grants from NIHR during conduct of the study  
53

54  
55 NM leads and directs NNRD  
56

57  
58 GS reports grants from NIHR HTA, during the conduct of the study; personal fees from  
59  
60 GlaxoSmithKline Research and Development Limited, grants from Sera Prognostics Inc,

1  
2  
3 non-financial support from Illumina Inc, grants, personal fees and non-financial support from  
4  
5 Roche Diagnostics Ltd, grants from Medical Research Council, grants from NIHR HTA,  
6  
7 grants from Wellbeing of Women, grants from Wellcome Trust, grants from NIHR, outside  
8  
9 the submitted work; In addition, Dr. Smith has a patent Named inventor on patent  
10  
11 application for a novel predictive test for fetal growth restriction (FGR) pending.  
12  
13  
14

15 JN reports grants from University of Edinburgh, during the conduct of the study; and JN  
16  
17 declares membership of the following NIHR boards: CPR Decision Making Committee, HTA  
18  
19 Commissioning Board, HTA Commissioning Sub-Board (EOI), HTA Funding Boards Policy  
20  
21 Group, HTA General Board, HTA Post-Board funding teleconference, NIHR CTU Standing  
22  
23 Advisory Committee, NIHR HTA and EME Editorial Board and Pre-exposure Prophylaxis  
24  
25 Impact Review Panel; and the MRC/NIHR EME Funding Board.  
26  
27  
28  
29

### 30 **DATA STATEMENT**

31  
32  
33 Individual NHS organisations are the data controllers for the study. We will not be able to  
34  
35 share data for the study as we are not the data controllers. All results put into the public  
36  
37 domain will be subject to statistical disclosure control according to usual processes. Meta-  
38  
39 data produced in this study will be made available to Health Data Research UK (HDRUK)  
40  
41 Gateway. Applications to use the Scottish datasets included in the study can be made via  
42  
43 [44 https://www.informationgovernance.scot.nhs.uk/pbphsc/](https://www.informationgovernance.scot.nhs.uk/pbphsc/)  
45  
46  
47  
48  
49  
50  
51  
52  
53  
54  
55  
56  
57  
58  
59  
60

**REFERENCES**

1. National Maternity and Perinatal Audit: Clinical Report 2019. Based on births in NHS maternity services between 1 April 2016 and 31 March 2017. London: RCOG; 2019.
2. Grobman WA, Rice MM, Reddy UM, et al. Labor Induction versus Expectant Management in Low-Risk Nulliparous Women. *N Engl J Med* 2018;379(6):513-23;
3. Stock SJ, Ferguson E, Duffy A, et al. Outcomes of elective induction of labour compared with expectant management: population based study. *BMJ*. 2012;344:e2838.
4. Knight HE, Cromwell DA, Gurol-Urganci I, et al. Perinatal mortality associated with induction of labour versus expectant management in nulliparous women aged 35 years or over: An English national cohort study. *PLoS Med*. 2017;14(11):e1002425.
5. Royal College of Midwives. *The Gathering Storm: England's Midwifery Workforce Challenges*, 2017
6. Shetty A, Burt R, Rice P, et al. Women's perceptions, expectations and satisfaction with induced labour--a questionnaire-based study. *Eur J Obstet Gynecol Reprod Biol*. 2005;123(1):56-61.
7. Henderson J, Redshaw M. Women's experience of induction of labor: a mixed methods study. *Acta Obstet Gynecol Scand*. 2013;92(10):1159-67.
8. Coates R, Cupples G, Scamell A, et al. Women's experiences of induction of labour: qualitative systematic review and thematic synthesis. *Midwifery*. 2018.
9. Norman JE, Stock S. Intracervical Foley catheter for induction of labour. *Lancet*. 2011;378(9809):2054-5.



- 1  
2  
3 10. NICE Guideline CG70. Induction of labour 2008.  
4  
5
- 6  
7 11. Jozwiak M, Oude Rengerink K, Benthem M, et al. Foley catheter versus vaginal  
8  
9 prostaglandin E2 gel for induction of labour at term (PROBAAT trial): an open-label,  
10  
11 randomised controlled trial. *Lancet*. 2011;378(9809):2095-103.  
12  
13
- 14 12. Alfirevic Z, Gyte GML, Nogueira Pileggi V, et al. Home versus in patient induction  
15  
16 of labour for improving birth outcomes. *Cochrane Database of Systemic Reviews*  
17  
18 2020, Issue8. Art No.: CD007372.DOI:10.1002/14651858.CD007372.pub4  
19  
20  
21
- 22 13. Cheyne H, McCourt C, Semple K. Mother knows best: developing a consumer led,  
23  
24 evidence informed, research agenda for maternity care. *Midwifery*. 2013;29(6):705-12  
25  
26  
27
- 28 14. Dos Santos F, Drymiotou S, Antequera A, et al. Development of a core outcome set  
29  
30 for trials on induction of labour (COSIOL): An international multi-stakeholder Delphi  
31  
32 study. *BJOG*. 2018.  
33  
34
- 35 15. Benchimol EI, Smeeth L, Guttman A, et al; RECORD Working Committee. The  
36  
37 REporting of studies Conducted using Observational Routinely-collected health Data  
38  
39 (RECORD) statement. *PLoS Med*. 2015 Oct 6;12(10):e1001885. doi:  
40  
41 10.1371/journal.pmed.1001885. eCollection 2015 Oct.  
42  
43  
44
- 45 16. von Elm E, Altman DG, Egger M, et al; STROBE Initiative. The Strengthening the  
46  
47 Reporting of Observational Studies in Epidemiology (STROBE) statement: guidelines  
48  
49 for reporting observational studies. *PLoS Med*. 2007 Oct 16;4(10):e296.  
50  
51  
52
- 53 17. Jozwiak M, Oude Rengerink K, Ten Eikelder ML, et al. Foley catheter or  
54  
55 prostaglandin E2 inserts for induction of labour at term: an open-label randomized  
56  
57 controlled trial (PROBAAT-P trial) and systematic review of literature. *Eur J Obstet*  
58  
59 *Gynecol Reprod Biol*. 2013;170(1):137-45.  
60

- 1  
2  
3 18. Consolidated Health Economic Evaluation Reporting Standards (CHEERS) statement  
4  
5 BMJ 2013; 346 doi: <https://doi.org/10.1136/bmj.f1049>  
6  
7
- 8  
9 19. Unit Costs of Health and Social Care 2018: University of Kent at Canterbury:  
10  
11 PSSRU, 2018  
12  
13
- 14 20. Kreif N, Grieve R, Sadique MZ. Statistical methods for cost-effectiveness analyses that  
15  
16 use observational data: a critical appraisal tool and review of current practice. *Health*  
17  
18 *Econ.* 2013;22(4):486-500  
19  
20
- 21 21. <https://www.onlinesurveys.ac.uk>  
22  
23 Accessed December 2020  
24  
25  
26  
27
- 28 22. Vogel JP, Osoti AO, Kelly AJ, et al. Pharmacological and mechanical interventions  
29  
30 for labour induction in outpatient settings. *Cochrane Database Syst Rev.*  
31  
32 2017;9:CD007701.  
33  
34
- 35 23. Adelson PL, Wedlock GR, Wilkinson CS, et al. A cost analysis of inpatient compared  
36  
37 with outpatient prostaglandin E2 cervical priming for induction of labour: results from  
38  
39 the OPRA trial. *Aust Health Rev.* 2013;37(4):467-73.  
40  
41  
42
- 43 24. Sharp AN, Stock SJ, Alfirovic Z. Outpatient induction of labour in the UK: a survey  
44  
45 of practice. *Eur J Obstet Gynecol Reprod Biol.* 2016;204:21-3.  
46  
47  
48
- 49 25. Kelly AJ, Alfirovic Z, Ghosh A. Outpatient versus inpatient induction of labour for  
50  
51 improving birth outcomes. *Cochrane Database Syst Rev.* 2013(11):CD007372.  
52  
53  
54  
55  
56  
57  
58  
59  
60

- 1  
2  
3 26. Rose Coates, Georgina Cupples, Amanda Scamell, et al. Women's experiences of  
4 outpatient induction of labour with double balloon catheter or prostaglandin pessary:  
5  
6 A qualitative study, *Women and Birth* (2020), <https://doi.org/10.1016/j.wombi.2020.07.00>  
7  
8  
9  
10  
11  
12  
13  
14  
15  
16  
17  
18  
19  
20  
21  
22  
23  
24  
25  
26  
27  
28  
29  
30  
31  
32  
33  
34  
35  
36  
37  
38  
39  
40  
41  
42  
43  
44  
45  
46  
47  
48  
49  
50  
51  
52  
53  
54  
55  
56  
57  
58  
59  
60

For peer review only

## TABLES

Table 1: Secondary outcomes

| Safety outcomes | <i>Baby</i>                                                                      | <i>Maternal</i>                                                                                  |
|-----------------|----------------------------------------------------------------------------------|--------------------------------------------------------------------------------------------------|
|                 | Any neonatal unit admission (any level of care)                                  | Intensive care unit transfer                                                                     |
|                 | Neonatal intensive care unit (NICU) admission                                    | High dependency level care                                                                       |
|                 | Duration of neonatal unit stay                                                   | Hyperstimulation or tachysystole (as defined by care givers)                                     |
|                 | Duration of NICU stay                                                            | Hyperstimulation or tachysystole causing CTG abnormality (as defined by care givers)             |
|                 | APGAR score <7 at 5 minutes                                                      | Umbilical cord prolapse                                                                          |
|                 | APGAR score <4 at 5 minutes                                                      | Birth outwith hospital                                                                           |
|                 | Arterial Cord Blood pH <7.1                                                      | Postpartum haemorrhage 1000ml or more                                                            |
|                 | Arterial Cord base excess >12mmol/L                                              | Maternal pyrexia 38 °C or more after commencing cervical ripening ( <i>Exploratory outcome</i> ) |
|                 | Neonatal Seizures                                                                |                                                                                                  |
|                 | Hypoxic Ischaemic Encephalopathy (as recorded by care givers)                    |                                                                                                  |
|                 | Level 2 or Level 3 Hypoxic Ischaemic Encephalopathy (as recorded by care givers) |                                                                                                  |

1  
2  
3  
4  
5  
6  
7  
8  
9  
10  
11  
12  
13  
14  
15  
16  
17  
18  
19  
20  
21  
22  
23  
24  
25  
26  
27  
28  
29  
30  
31  
32  
33  
34  
35  
36  
37  
38  
39  
40  
41  
42  
43  
44  
45  
46

|                                      |                                                                                                                                                                                                                                                                                                                                                                                                                                                                                                                                                                                                                                                                                                                                                                                                                                                                                       |  |
|--------------------------------------|---------------------------------------------------------------------------------------------------------------------------------------------------------------------------------------------------------------------------------------------------------------------------------------------------------------------------------------------------------------------------------------------------------------------------------------------------------------------------------------------------------------------------------------------------------------------------------------------------------------------------------------------------------------------------------------------------------------------------------------------------------------------------------------------------------------------------------------------------------------------------------------|--|
|                                      | <p>Meconium aspiration syndrome</p> <p>Mechanical ventilation</p> <p>Intracranial haemorrhage</p> <p>Stillbirth after admission/first attendance for induction of labour (excluding deaths from congenital anomalies)</p> <p>Early neonatal death up to 7 days after birth (day 0-6; excluding deaths from congenital anomalies)</p> <p>Treatment for neonatal sepsis [defined as positive blood, cerebral spinal fluid, or urine culture or cardiovascular collapse or X-ray confirming infection] (<i>Exploratory outcome</i>)</p> <p>Treatment in neonatal unit for neonatal infection (defined as antibiotic treatment and Temperature <math>\geq 37.5</math> °C or <math>&lt; 35.5</math> °C) (<i>Exploratory outcome</i>)</p> <p>Treatment for neonatal jaundice [defined as peak total bilirubin of at least 15mg or the use of phototherapy] (<i>Exploratory outcome</i>)</p> |  |
| <p><b>Effectiveness outcomes</b></p> | <p>Time from first cervical ripening agent to admission to labour ward/birth unit</p> <p>Time from first cervical ripening agent to birth</p>                                                                                                                                                                                                                                                                                                                                                                                                                                                                                                                                                                                                                                                                                                                                         |  |

|                             |                                                                                                                                                                                                                                                                                                                                                                                                                             |
|-----------------------------|-----------------------------------------------------------------------------------------------------------------------------------------------------------------------------------------------------------------------------------------------------------------------------------------------------------------------------------------------------------------------------------------------------------------------------|
|                             | <p>More than one cervical ripening agent used</p> <p>Duration of antenatal hospital stay for cervical ripening</p> <p>Duration of labour ward admission until birth</p> <p>Duration postnatal hospital stay (mother)</p> <p>Total hospital stay</p> <p>Hours spent at home</p> <p>Oxytocin use</p> <p>Mode of birth</p> <p>Birth in obstetric unit</p> <p>Birth in alongside midwifery unit (if available at that site)</p> |
| <b>Mother baby outcomes</b> | <p>Breastfeeding at discharge from maternity care</p> <p>Skin to skin at birth</p>                                                                                                                                                                                                                                                                                                                                          |
| <b>Cost effectiveness</b>   | <p><i>Primary outcomes</i></p> <p>Incremental cost per neonatal admissions avoided (home versus in-hospital)</p> <p>Incremental quality adjusted life year (QALYs) (home versus in-hospital)</p>                                                                                                                                                                                                                            |

1  
2  
3  
4  
5  
6  
7  
8  
9  
10  
11  
12  
13  
14  
15  
16  
17  
18  
19  
20  
21  
22  
23  
24  
25  
26  
27  
28  
29  
30  
31  
32  
33  
34  
35  
36  
37  
38  
39  
40  
41  
42  
43  
44  
45  
46

|                                                                  |                                                                                                                                                                                                                                                                                                                                                                                                                                                                          |
|------------------------------------------------------------------|--------------------------------------------------------------------------------------------------------------------------------------------------------------------------------------------------------------------------------------------------------------------------------------------------------------------------------------------------------------------------------------------------------------------------------------------------------------------------|
|                                                                  | <p><i>Other (exploratory) economic outcomes</i></p> <p>Incremental cost per hour prevented from hospital admission to delivery/birth</p> <p>Incremental cost per neonatal admission avoided (home balloon catheter versus home dinoprostone)</p> <p>Incremental cost per QALY (home balloon catheter versus home dinoprostone)</p> <p>Incremental cost per hour prevented from hospital admission to delivery/birth (home balloon catheter versus home dinoprostone)</p> |
| <p><b>Outcomes to check comparability of groups/matching</b></p> | <p>Birthweight</p> <p>Birthweight centile</p> <p>Small for gestational age (&lt;10<sup>th</sup> centile for gestational age)</p> <p>Large for gestational age (&gt;90<sup>th</sup> centile for gestational age)</p>                                                                                                                                                                                                                                                      |

|                                                |                                                                                                                                                                                                                                                                                                                                                                |
|------------------------------------------------|----------------------------------------------------------------------------------------------------------------------------------------------------------------------------------------------------------------------------------------------------------------------------------------------------------------------------------------------------------------|
| <b>qCHOICE process<br/>evaluation outcomes</b> | <p><b><i>Primary Outcome</i></b></p> <p>Sense of control (agency) in labour</p> <p><b><i>Secondary Outcomes</i></b></p> <p>Women's satisfaction with IOL care</p> <p>Women's postnatal psychological wellbeing</p> <p>Women's overall evaluation of their labour and birth experience (qualitative analysis)</p> <p>Costs incurred by the woman and family</p> |
|------------------------------------------------|----------------------------------------------------------------------------------------------------------------------------------------------------------------------------------------------------------------------------------------------------------------------------------------------------------------------------------------------------------------|



Figure 1. Process evaluation logic model – V1 18/12/18

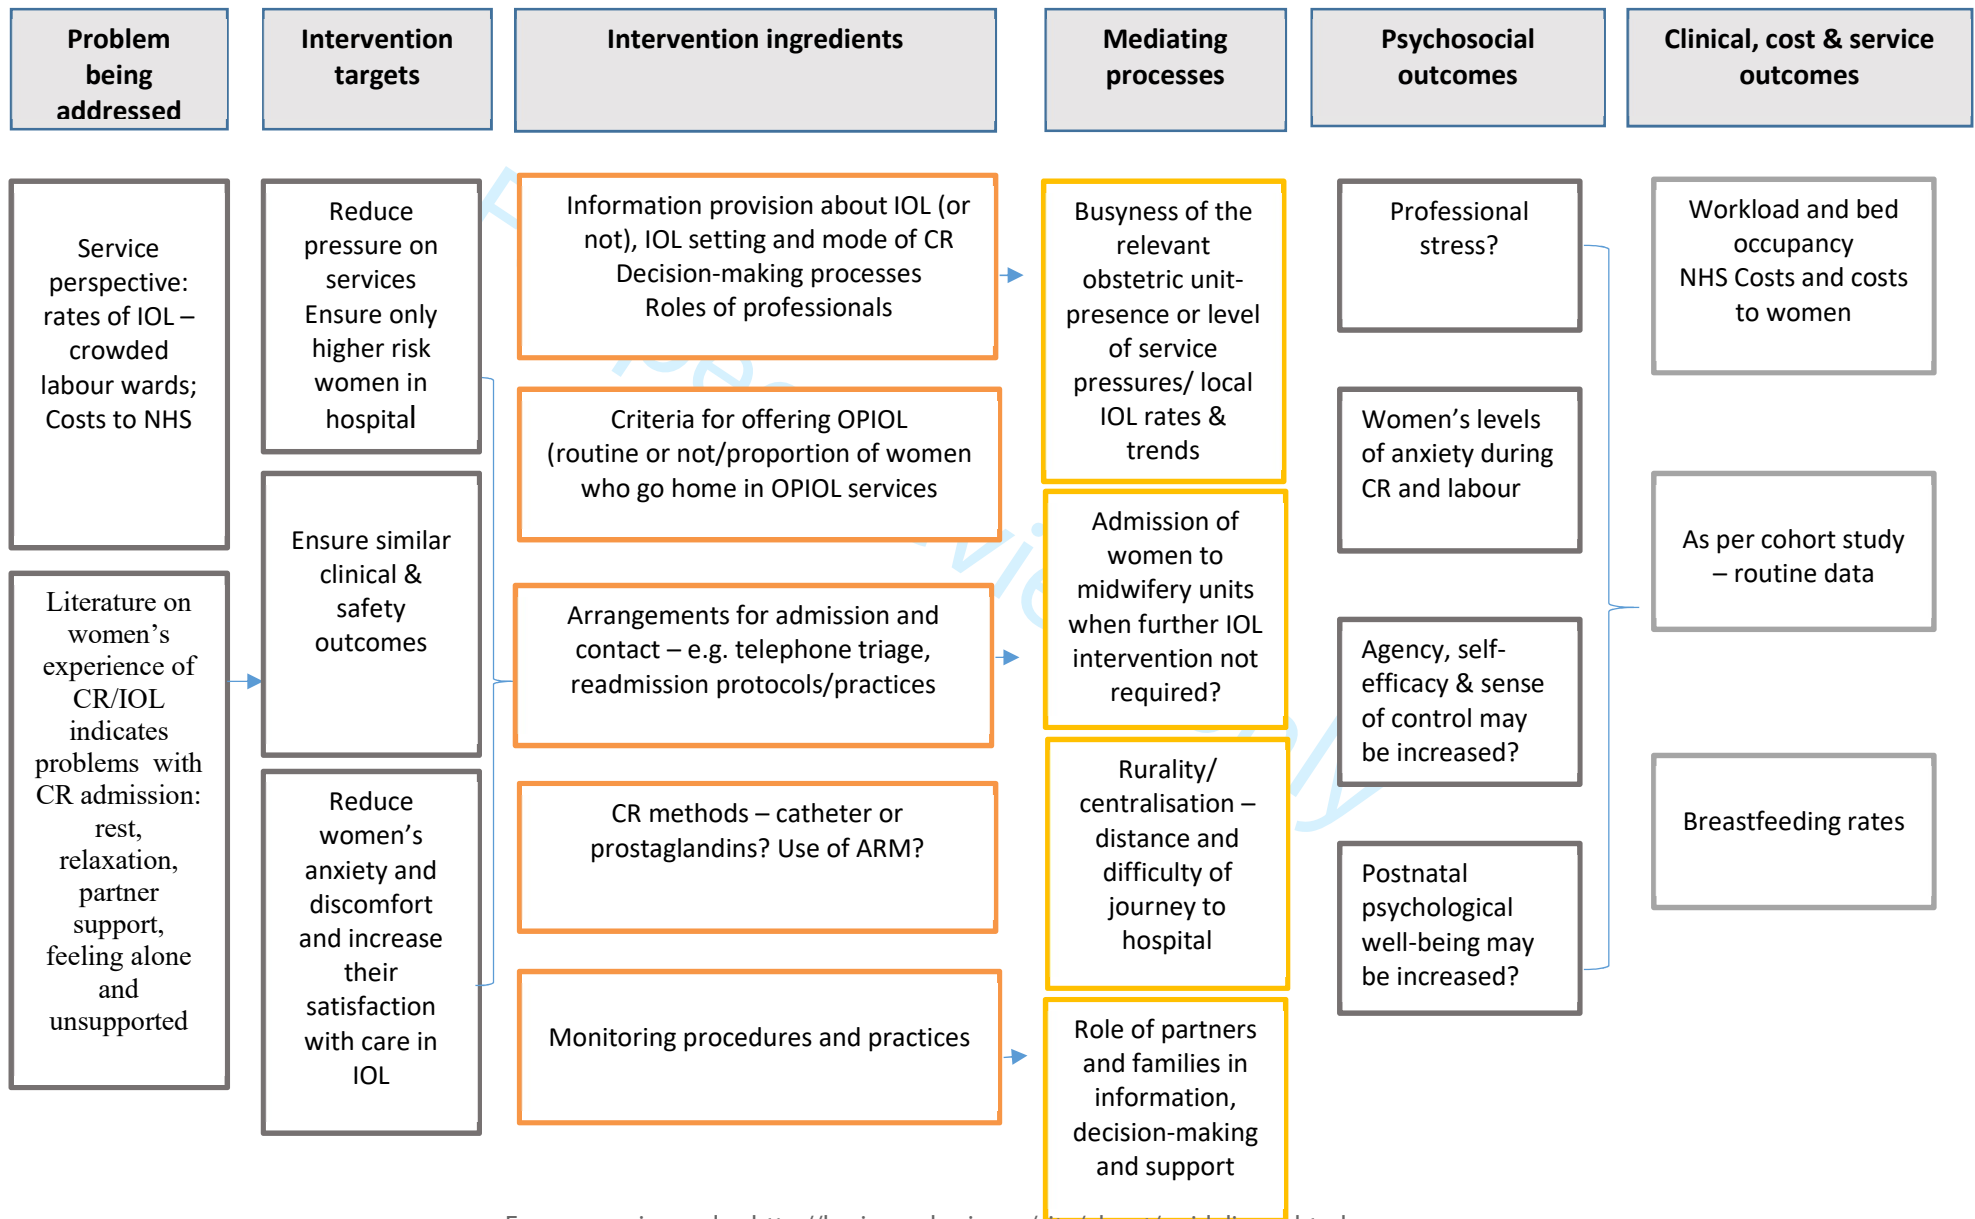

# BMJ Open

## Cervical ripening at home or in-hospital - prospective cohort study and process evaluation (CHOICE) study: Protocol

|                                 |                                                                                                                                                                                                                                                                                                                                                                                                                                                                                                                                                                                                                                                                                                                                                                                                                                                                                                                                                                                                                                                                                                                                                                                                                                                                                                                                                                                                                                                 |
|---------------------------------|-------------------------------------------------------------------------------------------------------------------------------------------------------------------------------------------------------------------------------------------------------------------------------------------------------------------------------------------------------------------------------------------------------------------------------------------------------------------------------------------------------------------------------------------------------------------------------------------------------------------------------------------------------------------------------------------------------------------------------------------------------------------------------------------------------------------------------------------------------------------------------------------------------------------------------------------------------------------------------------------------------------------------------------------------------------------------------------------------------------------------------------------------------------------------------------------------------------------------------------------------------------------------------------------------------------------------------------------------------------------------------------------------------------------------------------------------|
| Journal:                        | <i>BMJ Open</i>                                                                                                                                                                                                                                                                                                                                                                                                                                                                                                                                                                                                                                                                                                                                                                                                                                                                                                                                                                                                                                                                                                                                                                                                                                                                                                                                                                                                                                 |
| Manuscript ID                   | bmjopen-2021-050452.R1                                                                                                                                                                                                                                                                                                                                                                                                                                                                                                                                                                                                                                                                                                                                                                                                                                                                                                                                                                                                                                                                                                                                                                                                                                                                                                                                                                                                                          |
| Article Type:                   | Protocol                                                                                                                                                                                                                                                                                                                                                                                                                                                                                                                                                                                                                                                                                                                                                                                                                                                                                                                                                                                                                                                                                                                                                                                                                                                                                                                                                                                                                                        |
| Date Submitted by the Author:   | 30-Mar-2021                                                                                                                                                                                                                                                                                                                                                                                                                                                                                                                                                                                                                                                                                                                                                                                                                                                                                                                                                                                                                                                                                                                                                                                                                                                                                                                                                                                                                                     |
| Complete List of Authors:       | <p>Stock, Sarah; The University of Edinburgh<br/>           Bhide, Amarnath; St George's University of London<br/>           Richardson, Heather; NHS Lothian University Hospitals Division<br/>           Black, Mairead; University of Aberdeen<br/>           Yuill, Cassandra; City University of London<br/>           Harkness, Mairi; University of Stirling<br/>           Reid, Maggie; The University of Edinburgh<br/>           Wee, Fiona; The University of Edinburgh<br/>           Cheyne, Helen; University of Stirling<br/>           McCourt, Christine; City University, City University London<br/>           Rana, Dikshyanta; University of Glasgow, Institute of Health and Wellbeing<br/>           Boyd, Kathleen; University of Glasgow, Health Economics &amp; Health Technology Assessment<br/>           Sanders, Julia; Cardiff University, School of Healthcare Sciences<br/>           Heera, Neelam; Patient and Public Involvement Representative<br/>           Huddleston, Jane; Patient and Public Involvement Representative<br/>           Denison, Fiona; The University of Edinburgh, MRC Centre for Reproductive Health<br/>           Pasupathy, Dharmintra; The University of Sydney<br/>           Modi, Neena; Imperial College London, Medicine<br/>           Smith, Gordon; University of Cambridge, Obstetrics and Gynaecology<br/>           Norrie, John ; The University of Edinburgh</p> |
| <b>Primary Subject Heading</b>: | Obstetrics and gynaecology                                                                                                                                                                                                                                                                                                                                                                                                                                                                                                                                                                                                                                                                                                                                                                                                                                                                                                                                                                                                                                                                                                                                                                                                                                                                                                                                                                                                                      |
| Secondary Subject Heading:      | Obstetrics and gynaecology                                                                                                                                                                                                                                                                                                                                                                                                                                                                                                                                                                                                                                                                                                                                                                                                                                                                                                                                                                                                                                                                                                                                                                                                                                                                                                                                                                                                                      |
| Keywords:                       | Maternal medicine < OBSTETRICS, Fetal medicine < OBSTETRICS, OBSTETRICS                                                                                                                                                                                                                                                                                                                                                                                                                                                                                                                                                                                                                                                                                                                                                                                                                                                                                                                                                                                                                                                                                                                                                                                                                                                                                                                                                                         |
|                                 |                                                                                                                                                                                                                                                                                                                                                                                                                                                                                                                                                                                                                                                                                                                                                                                                                                                                                                                                                                                                                                                                                                                                                                                                                                                                                                                                                                                                                                                 |

SCHOLARONE™  
Manuscripts



I, the Submitting Author has the right to grant and does grant on behalf of all authors of the Work (as defined in the below author licence), an exclusive licence and/or a non-exclusive licence for contributions from authors who are: i) UK Crown employees; ii) where BMJ has agreed a CC-BY licence shall apply, and/or iii) in accordance with the terms applicable for US Federal Government officers or employees acting as part of their official duties; on a worldwide, perpetual, irrevocable, royalty-free basis to BMJ Publishing Group Ltd ("BMJ") its licensees and where the relevant Journal is co-owned by BMJ to the co-owners of the Journal, to publish the Work in this journal and any other BMJ products and to exploit all rights, as set out in our [licence](#).

The Submitting Author accepts and understands that any supply made under these terms is made by BMJ to the Submitting Author unless you are acting as an employee on behalf of your employer or a postgraduate student of an affiliated institution which is paying any applicable article publishing charge ("APC") for Open Access articles. Where the Submitting Author wishes to make the Work available on an Open Access basis (and intends to pay the relevant APC), the terms of reuse of such Open Access shall be governed by a Creative Commons licence – details of these licences and which [Creative Commons](#) licence will apply to this Work are set out in our licence referred to above.

Other than as permitted in any relevant BMJ Author's Self Archiving Policies, I confirm this Work has not been accepted for publication elsewhere, is not being considered for publication elsewhere and does not duplicate material already published. I confirm all authors consent to publication of this Work and authorise the granting of this licence.

1  
2  
3 **Cervical ripening at home or in-hospital - prospective cohort study and process**  
4  
5 **evaluation (CHOICE) study: Protocol**  
6  
7

8  
9 Sarah J Stock, Usher Institute, University of Edinburgh NINE Edinburgh BioQuarter, 9 Little  
10 France Road, Edinburgh EH16 4UX UK sarah.stock@ed.ac.uk +44 (0)7894629934  
11  
12  
13 (corresponding author) ORCID ID 0000-0003-4308-856X  
14  
15

16  
17  
18 Dr Amarnath Bhide, Consultant Obstetrician, Obstetrics and Gynaecology, St George's  
19 University Hospitals Trust, London, UK. ORCID ID: 0000-3-2393-7501  
20  
21  
22

23  
24  
25 Heather Richardson, Subspecialty Registrar in Maternal and Fetal Medicine, Simpson Centre  
26 for Reproductive Health, NHS Lothian, Edinburgh, UK  
27  
28  
29

30  
31  
32 Dr Mairead Black, Senior Clinical Lecturer, Institute of Applied Health Sciences, University  
33 of Aberdeen, Aberdeen, UK  
34  
35  
36

37  
38  
39 Dr Cassandra Yuill, Research Fellow, Centre for Maternal & Child Health Research  
40 School of Health Sciences, City, University of London, London, UK  
41  
42  
43  
44  
45

46  
47 Dr Mairi Harkness, Nursing, Midwifery and Allied Health Professions Research Unit  
48 (NMAHP), Research Fellow, University of Stirling, Stirling, UK  
49  
50  
51

52  
53  
54 Mrs Maggie Reid, Research Midwife, Usher Institute, University of Edinburgh, Edinburgh,  
55 UK  
56  
57  
58  
59  
60

1  
2  
3 Mrs Fiona Wee, Trial Manager, Usher Institute, University of Edinburgh, Edinburgh, UK  
4  
5  
6

7  
8 Professor Helen Cheyne, Royal College of Midwives Professor of Midwifery, Nursing  
9  
10 Midwifery and Allied Health Professions Research Unit (NMAHP), University of Stirling,  
11  
12 Stirling, UK. ORCID ID: 0000-0001-5738-8390  
13  
14  
15  
16

17  
18 Professor Christine McCourt, Professor of Maternal and Child Health, School of Health  
19  
20 Sciences, City, University of London, London, UK  
21  
22

23  
24 Miss Dikshyanta Rana, Research Assistant, Institute of Health and Well Being, University of  
25  
26 Glasgow, Glasgow, UK  
27  
28  
29

30  
31 Dr Kathleen Boyd, Senior Lecturer, Institute of Health and Well Being, University of  
32  
33 Glasgow, Glasgow, UK  
34  
35  
36

37  
38 Professor Julia Sanders, Professor of Clinical Nursing & Midwifery, School of Healthcare  
39  
40 Sciences, Cardiff University, Cardiff, UK  
41  
42  
43

44  
45 Miss Neelam Heera, Patient and Public Involvement Representative  
46  
47  
48

49  
50 Mrs Jane Huddleston, Patient and Public Involvement Representative  
51  
52  
53

54  
55 Professor Fiona Denison, Reader/Honorary Consultant in Maternal and Fetal Medicine, MRC  
56  
57 Centre for Reproductive Health, University of Edinburgh, Edinburgh, UK  
58  
59  
60

1  
2  
3 Professor Dharmintra Pasupathy, Professor of Maternal Fetal Medicine, Faculty of Medicine  
4 and Health, University of Sydney, Sydney, Australia  
5  
6  
7  
8  
9

10 Professor Neena Modi, Professor of Neonatal Medicine, School of Public Health, Imperial  
11 College London, London, UK  
12  
13  
14  
15  
16

17 Professor Gordon C S Smith, Professor of Obstetrics and Gynaecology, Department of  
18 Obstetrics and Gynaecology, The University of Cambridge, Cambridge, UK  
19  
20  
21  
22  
23

24 Professor John Norrie, Professor of Medical Statistics and Trial Methodology / Director of  
25 Edinburgh Clinical Trials Unit / Co-Head of Centre for Population Health Sciences, Usher  
26 Institute, University of Edinburgh, Edinburgh, UK  
27  
28  
29  
30  
31  
32

33 Word count: 6222  
34  
35

36 Key words: Induction of labour, Prostaglandin, Cervical Ripening Balloon, Pregnancy  
37  
38  
39  
40  
41  
42  
43  
44  
45  
46  
47  
48  
49  
50  
51  
52  
53  
54  
55  
56  
57  
58  
59  
60

## ABSTRACT

### Introduction

The aim of the CHOICE study is to compare home versus in-hospital cervical ripening to determine; whether home cervical ripening is safe (for the primary outcome of neonatal unit [NNU] admission), acceptable to women, and cost-effective from the perspective of both women and the NHS.

### Methods and analysis

We will perform a prospective multicentre observational cohort study with an internal pilot phase. We will obtain data from electronic health records from at least 14 maternity units offering only in-hospital cervical ripening and 12 offering dinoprostone home cervical ripening. We will also conduct a cost-effectiveness analysis and a mixed methods study to evaluate processes and women/partner experiences. Our primary sample size is 8,533 women with singleton pregnancies undergoing induction of labour (IOL) at 39<sup>+0</sup> weeks' gestation or more. To achieve this and contextualise our findings, we will collect data relating to a cohort of approximately 41,000 women undergoing IOL after 37 weeks.

We will use mixed effects logistic regression for the non-inferiority comparison of neonatal unit admission and propensity score matched adjustment to control for treatment indication bias.

The economic analysis will be undertaken from the perspective of the National Health and Personal Social Services (NHS and PSS) and the pregnant woman. It will include a within-study cost-effectiveness analysis and a lifetime cost-utility analysis to account for any long-term impacts of the cervical ripening strategies. Outcomes will be reported as incremental cost

1  
2  
3 per NNU admission avoided and incremental cost per quality adjusted life year (QALY)  
4  
5 gained.  
6  
7

### 8 9 **Research Ethics approval and Dissemination**

10  
11  
12 CHOICE has been funded and approved by the National Institute of Healthcare Research  
13  
14 Health Technology and Assessment (NIHR HTA), and the results will be disseminated via  
15  
16 publication in peer reviewed journals.  
17  
18

### 19 20 **ARTICLE SUMMARY**

#### 21 22 23 **Strengths and limitations of this study**

- 24  
25 ● This is a large study to evaluate the safety of at-home cervical ripening
- 26  
27 ● We will set up a platform for data collection using electronic health records to enable  
28  
29 future research into rare safety outcomes
- 30  
31 ● The study includes assessment of women's views and experiences using validated  
32  
33 questionnaires as well as qualitative methods.
- 34  
35 ● Observational design of the study makes it vulnerable to residual confounding.  
36  
37  
38  
39  
40  
41  
42  
43  
44  
45  
46  
47  
48  
49  
50  
51  
52  
53  
54  
55  
56  
57  
58  
59  
60



## INTRODUCTION

Induction of labour (IOL) is the most common obstetric intervention offered to women when risks of continuing the pregnancy are thought to outweigh risks of birth. Increases in IOL rates over the past 10 years mean that now 29.6% of all pregnant women in the UK have their labour induced.(1) IOL at term, when compared to expectant management of pregnancy, reduces caesarean birth, maternal hypertensive disease and complications,(2) as well as being associated with a reduction in perinatal mortality.(3, 4) The demands on maternity services are increasing to accommodate increasing rates of IOL.(5) Although IOL (compared to expectant management) reduces overall hospital stay, it increases the time on labour and delivery wards,(2) having a major impact on resources, staffing, and negatively impacts on women's experience of labour.(6-8)

Cervical ripening is a key component of IOL.(9) It may initiate labour, but is often followed by artificial rupture of membranes +/- intravenous oxytocin infusion. NICE guidance(10) recommends pre-induction cervical ripening in all women having IOL unless there is a contraindication.

Traditionally cervical ripening has been performed entirely in-hospital, to allow monitoring of maternal/fetal wellbeing and early recognition of complications.(11) However, an increasing number of UK maternity units offer outpatient (home) cervical ripening. As the rate of IOL is increasing, home cervical ripening may provide opportunities to reduce the burden on the NHS, for example, by reducing hospital stay during IOL. However, the safety and acceptability of home cervical ripening have not been fully evaluated. NICE(10) identified the need to assess the safety, efficacy and clinical and cost-effectiveness of outpatient and inpatient IOL in the UK setting, taking into account women's views. A recent Cochrane review found insufficient evidence to draw conclusions on the efficacy, safety and cost-effectiveness of home-induction

1  
2  
3 of labour and indicated that large prospective cohort studies would be needed.(12) Maternity  
4 service users have identified IOL as an important research topic,(13) and women have reported  
5 specific negative experiences such as increased pain and anxiety and lack of support which  
6 may be alleviated by home cervical ripening.(8) Potential NHS cost savings of home cervical  
7 ripening could be offset by increased costs of any additional morbidity resulting from home  
8 cervical ripening, costs to parents may be increased, and acceptability of home cervical  
9 ripening is unknown. Health services need to balance the full resource impact of IOL with the  
10 need to provide safe and acceptable care.  
11  
12  
13  
14  
15  
16  
17  
18  
19  
20  
21

22  
23 In the cervical ripening at home or in-hospital – prospective cohort study and process  
24 evaluation (CHOICE) study, we will perform an observational cohort study with a cost-  
25 effectiveness analysis and process evaluation to address the question “Is it safe, effective, cost-  
26 effective and acceptable to women to carry out home cervical ripening during IOL?” These  
27 analyses will provide information to help women and their caregivers make informed decisions  
28 around how to have IOL.  
29  
30  
31  
32  
33  
34  
35  
36  
37

38 Our main aim is to compare the setting of cervical ripening at home versus in-hospital. As the  
39 NICE recommended agent for cervical ripening is vaginal prostaglandin, our primary  
40 comparison will be home dinoprostone versus in-hospital dinoprostone. In order to future-proof  
41 the study, we will include a secondary comparison: home cervical ripening with balloon  
42 catheter versus home cervical ripening with dinoprostone. By including two different methods  
43 of home cervical ripening within our study, we will provide initial comparative evidence on  
44 these two methods of home labour induction.  
45  
46  
47  
48  
49  
50  
51  
52  
53  
54  
55  
56  
57  
58  
59  
60

## METHODS AND ANALYSIS

### CHOICE Prospective Cohort study

#### Study design and setting

We will carry out a prospective multicentre cohort study using de-identified clinical data from electronic hospital records. The primary outcome will be non-inferiority of NNU/special care admission for 48 hours or longer, initiated within 48 hours of birth.

The study will be performed in at least 26 UK obstetric units, 14 of which offer exclusively in-hospital cervical ripening and 12 offer dinoprostone cervical ripening both in-hospital and at home.

Participating maternity units will be purposively selected to represent the diverse range of maternity service settings in the UK, and include urban tertiary referral units, mid-sized urban district general hospitals and small, more isolated, rural units.

#### Data sources

Data will be collected directly from electronic maternity (and neonatal) records for participants who had babies admitted to a neonatal unit. These data are recorded by clinical staff (midwives, doctors and neonatal nurses) during the course of antenatal, intrapartum and postpartum care. Existing data fields, supplemented by new bespoke, data entry fields enabled in the maternity dataset at participating sites will be used. Unless women opt-out of secondary data use (from similar studies we estimate <1% will opt out), de-identified data will be transferred from participating sites to a secure University of Edinburgh server for analysis.

1  
2  
3 No personal data will be collected. Potentially identifiable data, such as the date and time of  
4 birth, date of events such as commencing cervical ripening, hospital discharge, will be  
5 converted into gestation at birth (weeks + days); and antenatal and postnatal events into “t-x”  
6 and “t+x” hours and days respectively.  
7  
8  
9  
10  
11  
12

### 13 Population, inclusion and exclusion criteria

14  
15  
16  
17 We will initially apply broad inclusion criteria and collect data from all women having IOL at  
18 37<sup>+0</sup> weeks gestation or more to create a cohort for analyses. Women who have opted out of  
19 data provision will be excluded.  
20  
21  
22

23  
24  
25 We will then apply more stringent inclusion and exclusion criteria at the analysis stage for a  
26 suite of nested analyses. In our primary analysis, we will create a cohort of women with  
27 “uncomplicated” (ie those with no identified risk factors for adverse maternal or perinatal  
28 outcomes defined below) pregnancies in whom there was no contraindication to home  
29 cervical ripening, who had singleton pregnancies with IOL at 39 weeks gestation or more.  
30  
31  
32

33  
34 This group will include women having IOL for post-dates, but also women having IOL  
35 because of maternal or clinician preference, IOL for maternal age, IOL for discomfort or  
36 social indications. Exclusion criteria will consist of grand multiparity (6 or more previous  
37 births), previous caesarean section, antepartum stillbirth (before cervical ripening initiated),  
38 Class III obesity at booking (BMI 40 kg/m<sup>2</sup> or more), Prelabour rupture of membranes  
39 (ROM) documented as primary or other indication for IOL (prolonged ROM; Spontaneous  
40 ROM; Suspected Spontaneous ROM), Maternal or fetal condition that would or could  
41 preclude home cervical ripening documented as primary or other indication for IOL  
42 (Maternal conditions: proteinuria; hypertension; antepartum haemorrhage; diabetes; obstetric  
43 cholestasis; past obstetric history; pre-eclampsia; PIH/PET (not defined); PIH; PET;  
44 thrombophilia. Fetal conditions: oligohydramnios; reduced liquor volume; macrosomia;  
45  
46  
47  
48  
49  
50  
51  
52  
53  
54  
55  
56  
57  
58  
59  
60

1  
2  
3 intrauterine growth restriction (IUGR); static growth; congenital fetal anomaly;  
4  
5 polyhydramnios; abnormal CTG/Doppler; breech; reduced fetal movements; termination of  
6  
7 pregnancy for fetal anomaly).  
8  
9

10  
11 We will explore the potential for additional analyses which may include IOL for other  
12  
13 indications (e.g. reduced fetal movements) or in other populations (e.g. multiple pregnancies;  
14  
15 women with a previous caesarean birth). However, in general, home cervical ripening is only  
16  
17 offered to 'low risk' women, so we anticipate that numbers of higher risk women having home  
18  
19 IOL may not be high enough for meaningful analyses.  
20  
21  
22

### 23 Exposure and Outcomes

24  
25  
26  
27 Our primary aim is to compare home versus in-hospital cervical ripening. We will collect data  
28  
29 at individual-level. The exposure group will be women who, at the start of the cervical ripening  
30  
31 process, plan to have home cervical ripening. The comparator group will be women who  
32  
33 planned to have in-hospital cervical ripening from maternity units not offering home cervical  
34  
35 ripening. This will minimise potential bias arising from the fact that, in maternity units which  
36  
37 offer both home and in-hospital cervical ripening, the risk of complications in the babies of  
38  
39 women having home cervical ripening (lower risk pregnancies) is inherently different to that  
40  
41 of babies of women having in-hospital cervical ripening (higher risk pregnancies).  
42  
43  
44  
45

46  
47 As the NICE recommended agent for cervical ripening is vaginal prostaglandin, our primary  
48  
49 comparison will be home dinoprostone versus in-hospital dinoprostone. Dinoprostone is now  
50  
51 most commonly administered as 10mg slow-release pessary (Propess, Ferring) which stays in  
52  
53 place for 24 hours. We will use this formulation in our primary comparison.  
54  
55  
56

57 We will include a secondary exploratory comparison - home cervical ripening with balloon  
58  
59 catheter (exposure) versus home cervical ripening with dinoprostone (comparator), to explore  
60

1  
2  
3 if there are any indications of different safety profiles of these two methods of home cervical  
4 ripening.  
5  
6

7  
8  
9 Our proposed primary outcome will be admission to a NNU/Special care baby unit for 48 hours  
10 or longer, initiated within 48 hours of birth. NNU admission is a marker of neonatal morbidity  
11 and is the leading core outcome defined for studies of IOL.(14) Any increase in NNU admission  
12 of term babies is undesirable due to the separation of mother and baby. However, NNU  
13 admission rates are highly variable between maternity units and are likely to depend on local  
14 policies and culture. We therefore, plan to use a primary outcome which represents more severe  
15 neonatal morbidity (admission to a NNU within 48 h of birth for 48 h or longer) which is less  
16 likely to be influenced by site-specific factors. We may re-define the parameters of NNU  
17 admission used in the primary outcome after analysis of pilot data (see section on 'Pilot phase').  
18  
19  
20  
21  
22  
23  
24  
25  
26  
27  
28  
29

30  
31 We have prespecified a number of secondary outcomes to assess the safety of home cervical  
32 ripening with respect to neonatal and maternal morbidity, shown in Table 1. These include  
33 outcomes from a core outcome set for studies of IOL.(14) We will also include secondary  
34 outcomes relating to the effectiveness of home cervical ripening, to explore whether the  
35 setting of cervical ripening influences subsequent labour and birth. Mother and baby  
36 outcomes were suggested by our lay consultation as important to include. We will use  
37 birthweight, birthweight centile, small for gestational age and large for gestational age as  
38 parameters to check the validity of our matching procedures in analyses. Birthweight is an  
39 objective outcome that may represent pregnancy complications, but extremely unlikely to be  
40 affected by the setting of cervical ripening. Comparison of birthweights between groups  
41 should provide reassurance that we have minimised systemic bias in our analyses.  
42  
43  
44  
45  
46  
47  
48  
49  
50  
51  
52  
53  
54  
55  
56  
57  
58  
59  
60

## Statistical analysis

All analyses will be fully specified in a comprehensive Statistical Analysis Plan and agreed by the Steering Committee. Analyses will be carried out in accordance with relevant guidance including RECORD(15) and STROBE.(16)

We will include at least 14 maternity units offering only in-hospital cervical ripening and 12 offering dinoprostone home cervical ripening (~95,000 deliveries per annum). We will invite additional maternity units to opt in to data provision, to allow contingency in case of ‘cross overs’ due to sites changing their IOL protocols during the study period.

We considered a superiority design for CHOICE, but decided against it because i) safety is a key concern to both clinicians and women, and was specified as the important outcome in the commissioning brief; ii) it is not plausible to hypothesise that home cervical ripening (intervention) is safer than in-hospital cervical ripening (comparator – the standard of care); and iii) it is not ethical to use a superiority design to test an intervention which may be worse (in terms of safety) than the established standard. Therefore, a non-inferiority design was chosen with a non-inferiority margin of 4% (deemed as likely to be an important difference on consultation with women and clinicians) for the primary outcome of neonatal unit admission.

Establishing the appropriate non-inferiority margin was complicated by recognition that the dimensions that are hypothesised to show benefit, i.e. acceptability to women and partners, and a reduction in costs appeal to different audiences – women will be primarily interested in acceptability and largely indifferent to costs (in a free at point of care NHS), whereas the potential reduction in costs will likely be the primary focus for the healthcare provider. We were also conscious that due to the inflation of the sample size due to (a) clustering; (b) losses due to non-matching in the propensity analysis and (c) loss to follow up, the sample size for a

1  
2  
3 smaller non-inferiority margin would quickly become not feasible within a realistic budget and  
4  
5 timeframe. However, given that, regardless of a superiority or non-inferiority design, any  
6  
7 specific sample size will estimate the treatment effect to a certain level of precision (e.g. the  
8  
9 width of a 95% confidence interval), we are confident that our final comparison group of 1,920  
10  
11 in each arm (with ~ 115 NNU admissions in each arm [see sample size calculation below]), we  
12  
13 will generate sufficient high-quality evidence to definitively answer the questions around  
14  
15 safety, effectiveness, acceptability, and cost-effectiveness for this important question  
16  
17  
18  
19

20 For the principal analysis of the primary outcome, we will use mixed effects logistic regression  
21  
22 for the non-inferiority comparison of NNU admission within 48 hours of birth for 48 hours or  
23  
24 longer (Yes/No). As sensitivity analyses to demonstrate that the estimated treatment effects are  
25  
26 robust to the chosen method, we will also explore propensity score weighting (PSW by inverse  
27  
28 probability of receiving specified treatment) and single-stage regression, without using any  
29  
30 propensity scoring, adjusting directly for the baseline factors relevant for treatment indication.  
31  
32 We will also use propensity score matched (PSM) adjustment to control for treatment  
33  
34 indication bias. The logistic model underlying the PSM will include variables such as age,  
35  
36 Bishop's score, previous vaginal birth, co-morbidities, and relevant hospital-level factors, with  
37  
38 1:1 matching. Potential confounding variables will be identified before the start of the analysis,  
39  
40 and these will be finalised after exploration of the data at the pilot stage, through the creation  
41  
42 of directed acyclical graphs.  
43  
44  
45  
46  
47  
48

49 Similar analyses will be used for analyses of secondary outcomes, using logistic, linear,  
50  
51 negative binomial, and time-to-event regressions. For example, we will analyse the duration of  
52  
53 hospital stay during IOL, time spent at home, total hospital stay, and time to birth using linear  
54  
55 models; while birth outwith hospital and breastfeeding will be analysed using logistic  
56  
57 regression; and mode of birth using multinomial logistic regression.  
58  
59  
60



1  
2  
3 For the remaining maternal secondary outcomes, we will include hyperstimulation,  $\geq 1$   
4 induction agent, oxytocin use for induction or augmentation, maternal ICU/HDU admission,  
5  
6 haemorrhage, uterine rupture, pulmonary embolus, and cardio-respiratory arrest. For the  
7  
8 neonatal secondary outcomes, we will include meconium aspiration syndrome, respiratory  
9  
10 support, neonatal infection, umbilical cord prolapse, neonatal birth trauma, neonatal  
11  
12 encephalopathy (Grade II/III), therapeutic hypothermia and neonatal death. Logistic regression  
13  
14 and Poisson or negative binomial regression, possibly inflated for excess zeros will be used as  
15  
16 appropriate. For outcomes with a small number of events, we will use the appropriate exact  
17  
18 regression procedure. As per the primary outcome, we will assess the influence of missing data  
19  
20 for secondary outcomes using appropriate sensitivity-type analyses. We recognise that there  
21  
22 are many secondary outcomes being analysed, as per the recommended core outcome set (17).  
23  
24 We do not propose to make any formal statistical adjustment for the multiple comparisons.  
25  
26 However, a caveat will be clearly expressed regarding the possibility of type 1 statistical error,  
27  
28 given the multiple comparisons made. We will consider the following subgroup analyses, based  
29  
30 on sufficient numbers to allow meaningful analyses: 1) nulliparous and parous women; 2)  
31  
32 indication for IOL (post-dates IOL; maternal or clinician preference; maternal age; discomfort  
33  
34 or social indication)

35  
36 We propose the following sensitivity analyses. 1) Within-site comparison of home versus in-  
37  
38 hospital cervical ripening (restricted to sites that offer home cervical ripening) 2) Per protocol  
39  
40 analysis (women who actually are discharged home after commencing cervical ripening) 3)  
41  
42 Complete case analysis to assess the effect of any strategies to deal with missing data.  
43  
44

45  
46 Data from the larger cohort of women having IOL at 37<sup>+0</sup> weeks' gestation or more, will be  
47  
48 used to contextualise our findings on the background of unit practices and populations  
49  
50 undergoing IOL. There is considerable inter-unit variation in both the rates of IOL and the risk  
51  
52  
53  
54  
55  
56  
57  
58  
59  
60

1  
2  
3 profile of women giving birth, that need to be considered. It will also allow us to capture any  
4  
5 changes in practice over the study period regarding criteria for eligibility for home cervical  
6  
7 ripening and change in method of IOL. This will help ensure the generalisability of our  
8  
9 findings.  
10  
11  
12

13  
14 Future long-term outcome evaluation will be possible through data linkage to Hospital Episode  
15  
16 Statistics and Scottish Morbidity Records.  
17

### 18 19 Missing data 20

21  
22 We anticipate missing data, but estimate that no more than 10% of women will have missing  
23  
24 usable data on primary outcome, eligibility, setting of cervical ripening and/or have some part  
25  
26 of the baseline data (age, co-morbidities, and any relevant identified hospital-level factors). We  
27  
28 will use evidence-based strategies to minimise any such losses and recover any missing data  
29  
30 that is possible. We will monitor levels of missing data as the study progresses, identifying any  
31  
32 outcomes or exposures and/or sites that are prone to missingness, and take corrective action  
33  
34 (e.g. additional feedback and support). We will conduct appropriate sensitivity type analyses,  
35  
36 for example, using a multiple imputation approach assuming data are missing at random; and,  
37  
38 if the data warrant (for example, if there is differential missingness between the in-hospital and  
39  
40 at-home cohorts) non-ignorable (informative) missing data generating mechanisms.  
41  
42  
43  
44  
45

46  
47 We will also conduct an exploratory analysis comparing the two methods of home IOL, i.e.  
48  
49 dinoprostone vs. mechanical methods. We will use the same methods as outlined above for the  
50  
51 primary and secondary outcomes in the overall analysis.  
52  
53  
54  
55  
56  
57  
58  
59  
60

### Sample size

The sample size is based on our principal analysis (women with singleton pregnancies having IOL at 39 weeks gestation or more) and primary comparison (home cervical ripening vs in-hospital cervical ripening with dinoprostone), estimated 6% NNU admission rate (1) for babies born to mothers having IOL at >39 weeks gestation with no more than 4% excess NNU admission rate (from 6%), at 90% power, 2.5% 1-sided alpha, and an estimated ICC of 0.01. We will require 160 women in each of 12 sites (clusters) with uncomplicated pregnancies at 39 weeks or more undergoing IOL (total 1,920 in each arm). To account for the fact that i) only around 50% of women eligible for home cervical ripening in the intervention arm will actually initiate home cervical ripening, and ii) a larger pool of women is required in the control arm to allow for propensity score matching, our required sample size is  $1,920 * 2$  (number of arms) /  $0.5$  (numbers of women actually starting home cervical ripening and matching) /  $0.9$  (for missing data), giving an overall required sample size of 8,533.

Based on an estimate that 22% of all maternities have IOL at 39 weeks or more(1) and that ~29% of these would be eligible for participation in our principal analysis (from scoping data from potential participating sites), and, in home cervical ripening sites ~50% of these will take up home cervical ripening, we anticipate achieving our recruitment targets within 20 months.

Current data from the NMPA for 2019 suggests that the national average rate of IOL after 37 weeks is 29.6%.(1) As our proposed participating units have about 90,000 births per annum, we anticipate collecting data on approximately 41,000 women having IOL at 37 weeks gestation or more.

## Participant identification and opt out

Participants will be identified from data recorded in specified fields in electronic maternity records. We will use data fields indicating IOL, estimated due date (EDD) and date of IOL to identify women having IOL at 37 weeks gestation or more.

Women will be made aware of the CHOICE study through posters in participating sites; business cards; information leaflets; online adverts on hospital/maternity websites and relevant social media sites; and information in maternal electronic maternity records.

Women will be able to opt out of data provision by notifying their clinician or midwife, or emailing the study research midwife at the local site, and it will be recorded on their electronic record. There will be no restriction on co-enrolment in other studies.

## Pilot phase

We propose a pilot phase to determine the parameters of the primary outcome and feasibility of obtaining the required sample size for analysis. This is based on the evaluable comparison group of 1,920 women in each arm, so acts as an inherent check on home cervical ripening eligibility and uptake rates, the assumed level of missingness and attrition due to non-matching.

We will assess variation of the primary outcome at the pilot stage; along with that of other measures of neonatal morbidity included as secondary outcomes (e.g. any NNU admission, NICU admission). We may redefine the parameters of NNU admission used in the primary outcome after analysis of pilot data, choosing the one with the lowest ICC, or the one representing the least severe outcome which has an ICC of 0.01 or less. This decision will be made in consultation between the expert project management group, the trial steering committee (TSC) and the funder.

### CHOICE Health Economic Analyses

Health economic analysis will be specified in a health economic analysis plan and reported in line with CHEERS guidelines.(18)

Economic analyses will explore the cost-effectiveness of at home versus inpatient cervical ripening for women undergoing IOL. Two separate cost-effectiveness questions will be addressed: (i) home cervical ripening with dinoprostone compared to in-hospital cervical ripening with dinoprostone and (ii) home cervical ripening with balloon catheter compared to home cervical ripening with dinoprostone. The evaluation will involve within study cost-effectiveness analysis and a lifetime cost-utility analysis to account for any long-term impacts (cost and morbidity) of the alternative cervical ripening strategies. Resource use data will be obtained from the prospective multicentre observational cohort study using data obtained from the maternity information system, Badgernet Maternity and National Neonatal Research Database (NNRD) data.

Costs incurred by women and their families relating to IOL are relevant from the patient perspective and potentially important for the 'at-home' cervical ripening strategy. These data are not available from the observational datasets, and therefore tailored economic-related questions have been incorporated into a process evaluation survey described in section 5 below.

To account for bias in the observational data, methods such as multivariate regression and propensity scoring will be employed as recommended in guidelines for cost-effectiveness analysis based on observational data,(19,20) which is consistent with the main study statistical analyses for this study. To capture any cost and morbidity events incurred in the neonatal period, the within-study analysis will include the primary study endpoint (NNU admission within 48 hours of birth for 48 hours or more) up to one-month post-birth. Outcomes will be

1  
2  
3 reported as the incremental cost per NNU admission avoided (in line with primary study  
4 outcome) as well as incremental cost per birth up to 28 days post-birth.  
5  
6  
7

8  
9 The lifetime analysis will account for longer term costs, quality of life, morbidity and disability  
10 from both the NHS & PSS and patient perspective and will report outcomes in terms of  
11 incremental cost per Quality Adjusted Life Years (QALYs) gained.  
12  
13  
14  
15

### 16 17 **Qualitative (q)CHOICE Process evaluation**

18  
19  
20 The process evaluation, nested within the observational cohort study, will comprise of a  
21 questionnaire-based survey in at least 12 sites and five case studies. Both qualitative and  
22 quantitative data will be collected, specifically a women's experience questionnaire, semi-  
23 structured interviews with women and birth partners, audio recordings of clinician/women  
24 consultations, interviews and focus-group discussions with professionals. Figure 1 describes  
25 the initial process evaluation logic model hypothesising the chain linking interventions and  
26 outcomes. This will inform data collection and analysis. At the final stage of data analysis, we  
27 will share and discuss emerging findings with a group of service users to develop a revised  
28 logic model and explanatory framework.  
29  
30  
31  
32  
33  
34  
35  
36  
37  
38  
39  
40  
41

#### 42 Questionnaire-based survey

43  
44  
45 Questionnaire data collection will take place over a four- to six-month period early in the study.  
46  
47 CHOICE participating sites who use electronic maternity records accessible by women (the  
48 electronic equivalent of maternity hand-held records), will be invited to contribute to this part  
49 of the study. Women who have IOL at 39 weeks or more will receive a 'push or SMS  
50 notification' directing them to online study information when IOL is booked and a second  
51 notification around 10 days after they give birth. This will provide a link to the participant  
52 information sheets, consent form and online survey.  
53  
54  
55  
56  
57  
58  
59  
60

1  
2  
3 Push notifications are used by maternity services to prompt women to read information  
4 relating to their maternity care, including information within their electronic record. Women  
5 are able to opt out of SMS and push notifications, but routine monitoring of women's use of  
6 their online record shows that a sufficient number of women use notifications and continue to  
7 access their record postnatally, thus enabling a broad sample to be reached.  
8  
9

10  
11  
12 The survey landing page will include a summary of qCHOICE and links to the information  
13 sheets before directing women to the consent questions, which they are asked to complete  
14 before completing the survey. A telephone number will be supplied for women to call if they  
15 have any questions about the survey, or to request a postal survey if preferred. Surveys will be  
16 submitted online via Online Surveys,(21) by post or completed by phone with a member of the  
17 study team, with the support of an interpreter if needed. Participant contact details provided  
18 by survey respondents who are happy to be contacted further about a possible interview will  
19 be on a detachable back sheet of the questionnaire or a separate online page. Respondents will  
20 be informed that a £10 voucher will be offered to interview participants and that (with their  
21 consent) their birth partners may take part in an interview.  
22  
23  
24  
25  
26  
27  
28  
29  
30  
31  
32  
33  
34  
35  
36  
37  
38  
39

40 The survey will comprise validated tools as well as questions relating to service user costs, and  
41 the process of IOL as follows:  
42  
43  
44

45 1. The Labour Agency Scale (short form).(22) The LAS is a well-established, validated  
46 measure of women's experience during labour and birth. The short form LAS includes 10  
47 items with a 7-point Likert type response. It measures perceived control during labour, which  
48 is the woman's sense of mastery over internal and environmental factors and is highly  
49 correlated with satisfaction with care. The LAS will be the primary outcome.  
50  
51  
52  
53  
54  
55  
56  
57  
58  
59  
60

1  
2  
3 2. A modified version of the IOL satisfaction questionnaire(23) tested in the PROBIT-F trial.

4  
5 This questionnaire focuses specifically on women's experiences of aspects of IOL including  
6  
7 information, anxiety and physical and emotional discomfort.  
8  
9

10  
11 3. The short form Warwick-Edinburgh mental wellbeing scale WEMWBS.(24) A seven-item  
12  
13 scale that measures mental wellbeing (as opposed to mental illness or disorder) representing  
14  
15 positive attributes of wellbeing including feeling and functioning.  
16  
17

18  
19 4. Additional questions which will inform the economic analysis from the woman's perspective  
20  
21 will cover resource use and expenditures of cervical ripening for women including number of  
22  
23 returns and phone calls to hospital, time distance, mode of travel to and from hospital, partner  
24  
25 role, additional expenditure on maternity items and medication while at home, and additional  
26  
27 childcare expenditure (if any) while at home.  
28  
29

30  
31 5. The survey will include demographic questions, questions about the process of IOL,  
32  
33 questions relating to the impact of COVID 19 on their experience of IOL, a question asking  
34  
35 women if they would be willing to be contacted regarding possible participation in a semi-  
36  
37 structured interview and for permission for data linkage to the observational cohort study.  
38  
39

40  
41  
42 Survey data will be analysed using descriptive and inferential statistics. Descriptive statistics  
43  
44 with 95% confidence intervals will be reported for the total sample (by planned mode of  
45  
46 cervical ripening – home or hospital, by actual mode (as some women who plan one mode may  
47  
48 in practice have a different mode) and by study site. We will examine whether there are  
49  
50 statistically significant differences in the primary outcome of sense of control (labour agency)  
51  
52 and by psychosocial outcome of postnatal psychological wellbeing score (WEMWBS) between  
53  
54 women with home cervical ripening and women with in-hospital ripening. The covariates will  
55  
56  
57  
58  
59  
60



1  
2  
3 include the reason for IOL, gestational age, maternal age, parity, sociodemographic status,  
4  
5 ethnic group.  
6  
7

8  
9 The sample size required to compare the experiences of women who had home and hospital  
10  
11 cervical ripening is estimated to be 46 subjects within each of 12 sites (assuming equal numbers  
12  
13 within each site) i.e. 552 women in total. This is based on use of LAS(25) where a change of  
14  
15 5.5 points is considered clinically meaningful. In an individually randomised study, to have  
16  
17 90% power at a 5% level of significance to detect an effect size of 0.5 (two-sided) we would  
18  
19 need 85 evaluable subjects per arm (170 total). However, this has to be inflated for the  
20  
21 clustering within each site. We assume that the intraclass correlation coefficient is 0.05 in this  
22  
23 setting. We will also inflate the target sample by 10% to account for incomplete data/ unusable  
24  
25 questionnaires, aiming for 613 women in total.  
26  
27  
28

29  
30 We will invite all sites using accessible electronic maternity records to participate in the survey;  
31  
32 but with the option to opt out. We will include at least 12 sites, i.e. a total of at least 43,200  
33  
34 births annually across the sites. Our previous experience of questionnaire-based surveys, and  
35  
36 the UK's national maternity experience suggest a response rate of 40%. With an estimated  
37  
38 eligibility of 22% of all maternities having IOL at 39 weeks or more, and 15% of these having  
39  
40 home cervical ripening. We expect to achieve our sample size within four months and will  
41  
42 monitor recruitment rates from each site and if necessary extend the survey period to ensure an  
43  
44 adequate sample.  
45  
46  
47  
48

#### 49 50 Case studies

51  
52  
53 In-depth case studies will be undertaken at five sites. The sample of five case studies is  
54  
55 pragmatic, and selection is designed to balance depth with breadth of information and analysis  
56  
57 with sites chosen to provide diversity and balance of service types on the basis of geography,  
58  
59  
60

1  
2  
3 service configuration and approaches to provision of IOL. We will undertake semi-structured  
4 interviews with women, their partners and a range of staff and stakeholders in each site. A topic  
5 guide and pathway mapping will be used to help focus the discussion. Interviews will explore  
6 perceptions and experiences of the service approach to induction and implementation of local  
7 cervical ripening protocols in practice.  
8  
9  
10  
11  
12  
13

### 14 15 16 *Women and partner interviews* 17

18  
19 Women will be eligible for interview if they have IOL at a gestation of 39<sup>+0</sup> weeks gestation  
20 or more, have given birth in one of the case study sites and responded to the survey indicating  
21 a willingness to be contacted regarding the interview.  
22  
23  
24  
25  
26

27 A purposive sample of women will be included. A sampling frame will be constructed within  
28 and across case study sites with the aim of including a balance of nulliparous and parous  
29 women, women who were offered outpatient cervical ripening but declined, women who  
30 experienced this and women who were not offered it. The women approached will be given the  
31 opportunity to ask further questions and at least one week to decide whether to participate in  
32 an interview. Interviews will be conducted online or by telephone using a verbal consent  
33 protocol prior to the start of the interview. All women who consent to participate in an interview  
34 will also be asked whether they give consent for their birth partner to be invited for an  
35 interview. We anticipate interviewing between 10-15 women in each site (total 50-75  
36 participants) and, assuming that around half of participants may have a birth partner willing to  
37 participate, we anticipate including around 25-38 birth partners. If couples express a preference  
38 to be interviewed together, this will be accommodated. 'Birth partner' will be defined by the  
39 women themselves.  
40  
41  
42  
43  
44  
45  
46  
47  
48  
49  
50  
51  
52  
53  
54  
55  
56  
57  
58  
59  
60

1  
2  
3 *Key professionals, stakeholders and maternity professionals' interviews and focus groups*  
4  
5

6  
7 Key professionals and stakeholders for interviews will be identified with the support of the PI  
8  
9 for each local case study service but will typically include: head of midwifery, clinical director,  
10  
11 consultant obstetricians and midwives, chairs of local Maternity Voices Partnerships,  
12  
13 representatives from local maternity service user groups and service commissioners or health  
14  
15 board leads. Interviews will be conducted online or by telephone. Verbal consent will be  
16  
17 obtained at the start of the interview. We anticipate undertaking around 10 individual  
18  
19 interviews in each case study site.  
20  
21

22  
23  
24 Midwives and obstetricians will be invited to participate in focus group discussions and we  
25  
26 estimate that three focus groups comprising of six to eight participants (total 18-24 participants)  
27  
28 will be held in each site. These will be organised to facilitate participation of a diversity of  
29  
30 maternity professionals, by including in a local audit meeting or study day. Focus groups may  
31  
32 be held online or in person if access to the case study site is possible.  
33  
34

35  
36 *Observations of maternity visits discussing IOL*  
37  
38

39  
40 A small convenience sample of maternity visits will be included in each case study site in order  
41  
42 to enable analysis of information provision and women's information needs. Up to five  
43  
44 maternity professionals in each site will be provided with a digital recorder and given  
45  
46 instructions on use and asked to record three consecutive interviews with the woman's consent.  
47  
48 We will follow up the recorded consultations with a brief (up to ten minute) telephone interview  
49  
50 to explore the woman's understanding of the information provided.  
51  
52  
53  
54  
55  
56  
57  
58  
59  
60

### *Qualitative data analysis*

All qualitative data will be transcribed and entered into the analysis support software NVivo to support data management and analysis. Documentary sources will be added to the NVivo project file as PDF files. Visual approaches will be used to support the discussion and analysis of the pathways. Recordings of discussions will be analysed using a structured approach to conversation analysis. Interviews with women, partners and health professionals will be transcribed and analysed using a thematic framework approach, based on frameworks developed in recent work by the study team as part of the PROBIT-F trial (8, 26).

### **RESEARCH ETHICS APPROVAL AND DISSEMINATION**

CHOICE has National Research Ethics Service Committee approval (York and Humber - Sheffield Research Ethics Committee, REC reference: 20/YH/0145), National R&D approval in Scotland (NHS Research Scotland Permissions) and England (Health Research Authority), and approval from the Public Benefit and Privacy Panel (PBPP) in Scotland is pending. The study will be conducted in accordance with the principles of the International Conference on Harmonisation Tripartite Guideline for Good Clinical Practice (ICH GCP).

CHOICE is registered on the ISRCTN registry (ISRCTN32652461)

Results will be submitted for peer reviewed academic publication and presented at international conferences. Meta-data produced in this study will also become available to Health Data Research UK (HDRUK) Gateway. Strengthening the Reporting of Observational Studies in Epidemiology (STROBE) guidance(16) and Reporting of studies Conducted using Observational Routinely-collected Data (RECORD) guidance(15) will be used to guide transparent reporting.

## **AUTHOR CONTRIBUTIONS**

SJS, GCS, JS and DP contributed to the conception of the study. SJS, AB, MB, HC, CMc, KB, JS, NH, JH, FD, DP, NM, GCS and JN acquired funding. SJS, AB, MB, HC, CMc, KB, JS, NH, JH, FD, DP, NM, GCS, HR, CY, MH, MR, FW, DR and JN contributed to the study design. SJS, HR, AB and FW drafted the first version of the manuscript. SJS, AB, HR, MB, HC, CMc, KB, JS, NH, JH, FD, DP, NM, GCS, CY, MH, MR, FW, DR and JN revised the manuscript for important intellectual content and gave final approval of the version to be published.

## **PATIENT AND PUBLIC INVOLVEMENT**

There are two PPI co-applicants on the study grant who have contributed to the protocol, study design and patient facing materials. A CHOICE Parent Advisory Group (PAG) has been established to provide further support and guidance on study materials and management.

## **ACKNOWLEDGMENTS**

We gratefully acknowledge the help of the following people:

Trial Steering Committee: Dr Brenda Kelly (Chair), Dr Sarah Stock, Fiona Fraser, Jaqueline Birks, Dr Tracey Mills, Dr Kate Walker, Fiona Wee.

The West Midlands NIHR Clinical Research Network, who are the lead network for the study in England, and are providing support with site feasibility and set up.

Clevermed Ltd, provider of BadgerNet maternity records system, who are providing technical expertise and facilitating data extracts from approved sites.

1  
2  
3 The Edinburgh Clinical Trials Unit (ECTU), who are providing trial management, data  
4 management and statistical support.  
5  
6  
7

8  
9 Delivered Social, who kindly created and donated the CHOICE study website completely  
10 free of charge as part of their social impact programme; Delivered Social Green.  
11  
12  
13

## 14 **FUNDING**

15  
16  
17  
18 CHOICE is funded by the National Institute of Healthcare Research Health Technology and  
19 Assessment (NIHR HTA) NIHR 127569. The views expressed are those of the authors and  
20 not necessarily those of the NIHR or the Department of Health and Social Care.  
21  
22  
23  
24  
25

26 SJS is supported by Wellcome Trust (209560/Z/17/Z)  
27  
28

## 29 **COMPETING INTERESTS**

30  
31  
32  
33 SS reports grants from NIHR, grants from Wellcome Trust, grants from Tommy's Charity,  
34 grants from MRC, during the conduct of the study.  
35  
36  
37

38  
39 AB reports a grant from UK National Institute of Health Research, Research for patient  
40 benefit program (NIHR RfPB) for Trans-cervical balloon catheter and its comparison to  
41 sustained release prostaglandin use for out-patient induction of labour in low-risk women: A  
42 feasibility study for a randomised controlled trial. (PB-PG-0815-20022), outside the  
43 submitted work.  
44  
45  
46  
47  
48

49  
50 MR is an employee of Clevermed Ltd.  
51  
52

53  
54 KB reports a grant from the NIHR during conduct of study  
55  
56

57  
58 JS reports grants from NIHR during conduct of the study  
59  
60

NM leads and directs NNRD

1  
2  
3 GCS reports grants from NIHR HTA, during the conduct of the study; personal fees from  
4  
5 GlaxoSmithKline Research and Development Limited, grants from Sera Prognostics Inc,  
6  
7 non-financial support from Illumina Inc, grants, personal fees and non-financial support from  
8  
9 Roche Diagnostics Ltd, grants from Medical Research Council, grants from NIHR HTA,  
10  
11 grants from Wellbeing of Women, grants from Wellcome Trust, grants from NIHR, outside  
12  
13 the submitted work; In addition, Dr. Smith has a patent Named inventor on patent  
14  
15 application for a novel predictive test for fetal growth restriction (FGR) pending.  
16  
17  
18  
19

20 JN reports grants from University of Edinburgh, during the conduct of the study; and JN  
21  
22 declares membership of the following NIHR boards: CPR Decision Making Committee, HTA  
23  
24 Commissioning Board, HTA Commissioning Sub-Board (EOI), HTA Funding Boards Policy  
25  
26 Group, HTA General Board, HTA Post-Board funding teleconference, NIHR CTU Standing  
27  
28 Advisory Committee, NIHR HTA and EME Editorial Board and Pre-exposure Prophylaxis  
29  
30 Impact Review Panel; and the MRC/NIHR EME Funding Board.  
31  
32  
33  
34

### 35 **DATA STATEMENT**

36  
37  
38 Individual NHS organisations are the data controllers for the study. We will not be able to  
39  
40 share data for the study as we are not the data controllers. All results put into the public  
41  
42 domain will be subject to statistical disclosure control according to usual processes. Meta-  
43  
44 data produced in this study will be made available to Health Data Research UK (HDRUK)  
45  
46 Gateway. Applications to use the Scottish datasets included in the study can be made via  
47  
48 <https://www.informationgovernance.scot.nhs.uk/pbpphsc/>  
49  
50  
51  
52  
53  
54  
55  
56  
57  
58  
59  
60

## REFERENCES

1. National Maternity and Perinatal Audit: Clinical Report 2019. Based on births in NHS maternity services between 1 April 2016 and 31 March 2017. London: RCOG; 2019.
2. Grobman WA, Rice MM, Reddy UM, et al. Labor Induction versus Expectant Management in Low-Risk Nulliparous Women. *N Engl J Med* 2018;379(6):513-23;
3. Stock SJ, Ferguson E, Duffy A, et al. Outcomes of elective induction of labour compared with expectant management: population based study. *BMJ*. 2012;344:e2838.
4. Knight HE, Cromwell DA, Gurol-Urganci I, et al. Perinatal mortality associated with induction of labour versus expectant management in nulliparous women aged 35 years or over: An English national cohort study. *PLoS Med*. 2017;14(11):e1002425.
5. Royal College of Midwives. *The Gathering Storm: England's Midwifery Workforce Challenges*, 2017
6. Shetty A, Burt R, Rice P, et al. Women's perceptions, expectations and satisfaction with induced labour--a questionnaire-based study. *Eur J Obstet Gynecol Reprod Biol*. 2005;123(1):56-61.
7. Henderson J, Redshaw M. Women's experience of induction of labor: a mixed methods study. *Acta Obstet Gynecol Scand*. 2013;92(10):1159-67.
8. Coates R, Cupples G, Scamell A, et al. Women's experiences of induction of labour: qualitative systematic review and thematic synthesis. *Midwifery*. 2018.



- 1  
2  
3 9. Norman JE, Stock S. Intracervical Foley catheter for induction of labour. *Lancet*.  
4  
5 2011;378(9809):2054-5.  
6  
7
- 8  
9 10. NICE Guideline CG70. Induction of labour 2008.  
10  
11
- 12 11. Jozwiak M, Oude Rengerink K, Benthem M, et al. Foley catheter versus vaginal  
13  
14 prostaglandin E2 gel for induction of labour at term (PROBAAT trial): an open-label,  
15  
16 randomised controlled trial. *Lancet*. 2011;378(9809):2095-103.  
17  
18
- 19  
20 12. Alfirevic Z, Gyte GML, Nogueira Pileggi V, et al. Home versus in patient induction  
21  
22 of labour for improving birth outcomes. *Cochrane Database of Systemic Reviews*  
23  
24 2020, Issue8. Art No.: CD007372.DOI:10.1002/14651858.CD007372.pub4  
25  
26
- 27  
28 13. Cheyne H, McCourt C, Semple K. Mother knows best: developing a consumer led,  
29  
30 evidence informed, research agenda for maternity care. *Midwifery*. 2013;29(6):705-12  
31  
32
- 33  
34 14. Dos Santos F, Drymiotou S, Antequera A, et al. Development of a core outcome set  
35  
36 for trials on induction of labour (COSIOL): An international multi-stakeholder Delphi  
37  
38 study. *BJOG*. 2018.  
39  
40
- 41  
42 15. Benchimol EI, Smeeth L, Guttman A, et al; RECORD Working Committee. The  
43  
44 REporting of studies Conducted using Observational Routinely-collected health Data  
45  
46 (RECORD) statement. *PLoS Med*. 2015 Oct 6;12(10):e1001885. doi:  
47  
48 10.1371/journal.pmed.1001885. eCollection 2015 Oct.  
49
- 50  
51 16. von Elm E, Altman DG, Egger M, et al; STROBE Initiative. The Strengthening the  
52  
53 Reporting of Observational Studies in Epidemiology (STROBE) statement: guidelines  
54  
55 for reporting observational studies. *PLoS Med*. 2007 Oct 16;4(10):e296.  
56  
57  
58  
59  
60

- 1  
2  
3  
4  
5  
6  
7  
8  
9  
10  
11  
12  
13  
14  
15  
16  
17  
18  
19  
20  
21  
22  
23  
24  
25  
26  
27  
28  
29  
30  
31  
32  
33  
34  
35  
36  
37  
38  
39  
40  
41  
42  
43  
44  
45  
46  
47  
48  
49  
50  
51  
52  
53  
54  
55  
56  
57  
58  
59  
60
17. Jozwiak M, Oude Rengerink K, Ten Eikelder ML, et al. Foley catheter or prostaglandin E2 inserts for induction of labour at term: an open-label randomized controlled trial (PROBAAT-P trial) and systematic review of literature. *Eur J Obstet Gynecol Reprod Biol.* 2013;170(1):137-45.
  18. Consolidated Health Economic Evaluation Reporting Standards (CHEERS) statement *BMJ* 2013; 346 doi: <https://doi.org/10.1136/bmj.f1049>
  19. Unit Costs of Health and Social Care 2018: University of Kent at Canterbury: PSSRU, 2018
  20. Kreif N, Grieve R, Sadique MZ. Statistical methods for cost-effectiveness analyses that use observational data: a critical appraisal tool and review of current practice. *Health Econ.* 2013;22(4):486-500
  21. <https://www.onlinesurveys.ac.uk>  
Accessed December 2020
  22. Vogel JP, Osoti AO, Kelly AJ, et al. Pharmacological and mechanical interventions for labour induction in outpatient settings. *Cochrane Database Syst Rev.* 2017;9:CD007701.
  23. Adelson PL, Wedlock GR, Wilkinson CS, et al. A cost analysis of inpatient compared with outpatient prostaglandin E2 cervical priming for induction of labour: results from the OPRA trial. *Aust Health Rev.* 2013;37(4):467-73.
  24. Sharp AN, Stock SJ, Alfirevic Z. Outpatient induction of labour in the UK: a survey of practice. *Eur J Obstet Gynecol Reprod Biol.* 2016;204:21-3.

1  
2  
3 25. Kelly AJ, Alfirevic Z, Ghosh A. Outpatient versus inpatient induction of labour for  
4  
5 improving birth outcomes. Cochrane Database Syst Rev. 2013(11):CD007372.  
6  
7  
8  
9

10  
11  
12  
13  
14 26. Rose Coates, Georgina Cupples, Amanda Scamell, et al. Women's experiences of  
15  
16 outpatient induction of labour with double balloon catheter or prostaglandin pessary:  
17  
18 A qualitative study, Women and Birth (2020), <https://doi.org/10.1016/j.wombi.2020.07.00>  
19  
20  
21  
22  
23  
24  
25  
26  
27  
28  
29  
30  
31  
32  
33  
34  
35  
36  
37  
38  
39  
40  
41  
42  
43  
44  
45  
46  
47  
48  
49  
50  
51  
52  
53  
54  
55  
56  
57  
58  
59  
60

1  
2  
3  
4  
5  
6  
7  
8  
9  
10  
11  
12  
13  
14  
15  
16  
17  
18  
19  
20  
21  
22  
23  
24  
25  
26  
27  
28  
29  
30  
31  
32  
33  
34  
35  
36  
37  
38  
39  
40  
41  
42  
43  
44  
45  
46  
47  
48  
49  
50  
51  
52  
53  
54  
55  
56  
57  
58  
59  
60

For peer review only

1  
2  
3  
4  
5  
6  
7  
8  
9  
10  
11  
12  
13  
14  
15  
16  
17  
18  
19  
20  
21  
22  
23  
24  
25  
26  
27  
28  
29  
30  
31  
32  
33  
34  
35  
36  
37  
38  
39  
40  
41  
42  
43  
44  
45  
46

**FIGURE LEGEND**

**Figure 1:** Logic model for the qCHOICE process evaluation

For peer review only

## TABLES

Table 1: Secondary outcomes

| Safety outcomes | <i>Baby</i>                                                                      | <i>Maternal</i>                                                                                  |
|-----------------|----------------------------------------------------------------------------------|--------------------------------------------------------------------------------------------------|
|                 | Any neonatal unit admission (any level of care)                                  | Intensive care unit transfer                                                                     |
|                 | Neonatal intensive care unit (NICU) admission                                    | High dependency level care                                                                       |
|                 | Duration of neonatal unit stay                                                   | Hyperstimulation or tachysystole (as defined by care givers)                                     |
|                 | Duration of NICU stay                                                            | Hyperstimulation or tachysystole causing CTG abnormality (as defined by care givers)             |
|                 | APGAR score <7 at 5 minutes                                                      | Umbilical cord prolapse                                                                          |
|                 | APGAR score <4 at 5 minutes                                                      | Birth outwith hospital                                                                           |
|                 | Arterial Cord Blood pH <7.1                                                      | Postpartum haemorrhage 1000ml or more                                                            |
|                 | Arterial Cord base excess >12mmol/L                                              | Maternal pyrexia 38 °C or more after commencing cervical ripening ( <i>Exploratory outcome</i> ) |
|                 | Neonatal Seizures                                                                |                                                                                                  |
|                 | Hypoxic Ischaemic Encephalopathy (as recorded by care givers)                    |                                                                                                  |
|                 | Level 2 or Level 3 Hypoxic Ischaemic Encephalopathy (as recorded by care givers) |                                                                                                  |

1  
2  
3  
4  
5  
6  
7  
8  
9  
10  
11  
12  
13  
14  
15  
16  
17  
18  
19  
20  
21  
22  
23  
24  
25  
26  
27  
28  
29  
30  
31  
32  
33  
34  
35  
36  
37  
38  
39  
40  
41  
42  
43  
44  
45  
46

|                                      |                                                                                                                                                                                                                                                                                                                                                                                                                                                                                                                                                                                                                                                                                                                                                                                                                                                                                       |  |
|--------------------------------------|---------------------------------------------------------------------------------------------------------------------------------------------------------------------------------------------------------------------------------------------------------------------------------------------------------------------------------------------------------------------------------------------------------------------------------------------------------------------------------------------------------------------------------------------------------------------------------------------------------------------------------------------------------------------------------------------------------------------------------------------------------------------------------------------------------------------------------------------------------------------------------------|--|
|                                      | <p>Meconium aspiration syndrome</p> <p>Mechanical ventilation</p> <p>Intracranial haemorrhage</p> <p>Stillbirth after admission/first attendance for induction of labour (excluding deaths from congenital anomalies)</p> <p>Early neonatal death up to 7 days after birth (day 0-6; excluding deaths from congenital anomalies)</p> <p>Treatment for neonatal sepsis [defined as positive blood, cerebral spinal fluid, or urine culture or cardiovascular collapse or X-ray confirming infection] (<i>Exploratory outcome</i>)</p> <p>Treatment in neonatal unit for neonatal infection (defined as antibiotic treatment and Temperature <math>\geq 37.5</math> °C or <math>&lt; 35.5</math> °C) (<i>Exploratory outcome</i>)</p> <p>Treatment for neonatal jaundice [defined as peak total bilirubin of at least 15mg or the use of phototherapy] (<i>Exploratory outcome</i>)</p> |  |
| <p><b>Effectiveness outcomes</b></p> | <p>Time from first cervical ripening agent to admission to labour ward/birth unit</p> <p>Time from first cervical ripening agent to birth</p>                                                                                                                                                                                                                                                                                                                                                                                                                                                                                                                                                                                                                                                                                                                                         |  |

|                                    |                                                                                                                                                                                                                                                                                                                                                                                                                             |
|------------------------------------|-----------------------------------------------------------------------------------------------------------------------------------------------------------------------------------------------------------------------------------------------------------------------------------------------------------------------------------------------------------------------------------------------------------------------------|
|                                    | <p>More than one cervical ripening agent used</p> <p>Duration of antenatal hospital stay for cervical ripening</p> <p>Duration of labour ward admission until birth</p> <p>Duration postnatal hospital stay (mother)</p> <p>Total hospital stay</p> <p>Hours spent at home</p> <p>Oxytocin use</p> <p>Mode of birth</p> <p>Birth in obstetric unit</p> <p>Birth in alongside midwifery unit (if available at that site)</p> |
| <p><b>Mother baby outcomes</b></p> | <p>Breastfeeding at discharge from maternity care</p> <p>Skin to skin at birth</p>                                                                                                                                                                                                                                                                                                                                          |
| <p><b>Cost effectiveness</b></p>   | <p><i>Primary outcomes</i></p> <p>Incremental cost per neonatal admissions avoided (home versus in-hospital)</p> <p>Incremental quality adjusted life year (QALYs) (home versus in-hospital)</p>                                                                                                                                                                                                                            |



1  
2  
3  
4  
5  
6  
7  
8  
9  
10  
11  
12  
13  
14  
15  
16  
17  
18  
19  
20  
21  
22  
23  
24  
25  
26  
27  
28  
29  
30  
31  
32  
33  
34  
35  
36  
37  
38  
39  
40  
41  
42  
43  
44  
45  
46

|                                                                  |                                                                                                                                                                                                                                                                                                                                                                                                                                                                          |
|------------------------------------------------------------------|--------------------------------------------------------------------------------------------------------------------------------------------------------------------------------------------------------------------------------------------------------------------------------------------------------------------------------------------------------------------------------------------------------------------------------------------------------------------------|
|                                                                  | <p><i>Other (exploratory) economic outcomes</i></p> <p>Incremental cost per hour prevented from hospital admission to delivery/birth</p> <p>Incremental cost per neonatal admission avoided (home balloon catheter versus home dinoprostone)</p> <p>Incremental cost per QALY (home balloon catheter versus home dinoprostone)</p> <p>Incremental cost per hour prevented from hospital admission to delivery/birth (home balloon catheter versus home dinoprostone)</p> |
| <p><b>Outcomes to check comparability of groups/matching</b></p> | <p>Birthweight</p> <p>Birthweight centile</p> <p>Small for gestational age (&lt;10<sup>th</sup> centile for gestational age)</p> <p>Large for gestational age (&gt;90<sup>th</sup> centile for gestational age)</p>                                                                                                                                                                                                                                                      |

1  
2  
3  
4  
5  
6  
7  
8  
9  
10  
11  
12  
13  
14  
15  
16  
17  
18  
19  
20  
21  
22  
23  
24  
25  
26  
27  
28  
29  
30  
31  
32  
33  
34  
35  
36  
37  
38  
39  
40  
41  
42  
43  
44  
45  
46

|                                            |                                                                                                                                                                                                                                                                                                                                                  |
|--------------------------------------------|--------------------------------------------------------------------------------------------------------------------------------------------------------------------------------------------------------------------------------------------------------------------------------------------------------------------------------------------------|
| <b>qCHOICE process evaluation outcomes</b> | <p><i>Primary Outcome</i></p> <p>Sense of control (agency) in labour</p> <p><i>Secondary Outcomes</i></p> <p>Women's satisfaction with IOL care</p> <p>Women's postnatal psychological wellbeing</p> <p>Women's overall evaluation of their labour and birth experience (qualitative analysis)</p> <p>Costs incurred by the woman and family</p> |
|--------------------------------------------|--------------------------------------------------------------------------------------------------------------------------------------------------------------------------------------------------------------------------------------------------------------------------------------------------------------------------------------------------|

Figure 1. Process evaluation logic model – V1 18/12/18

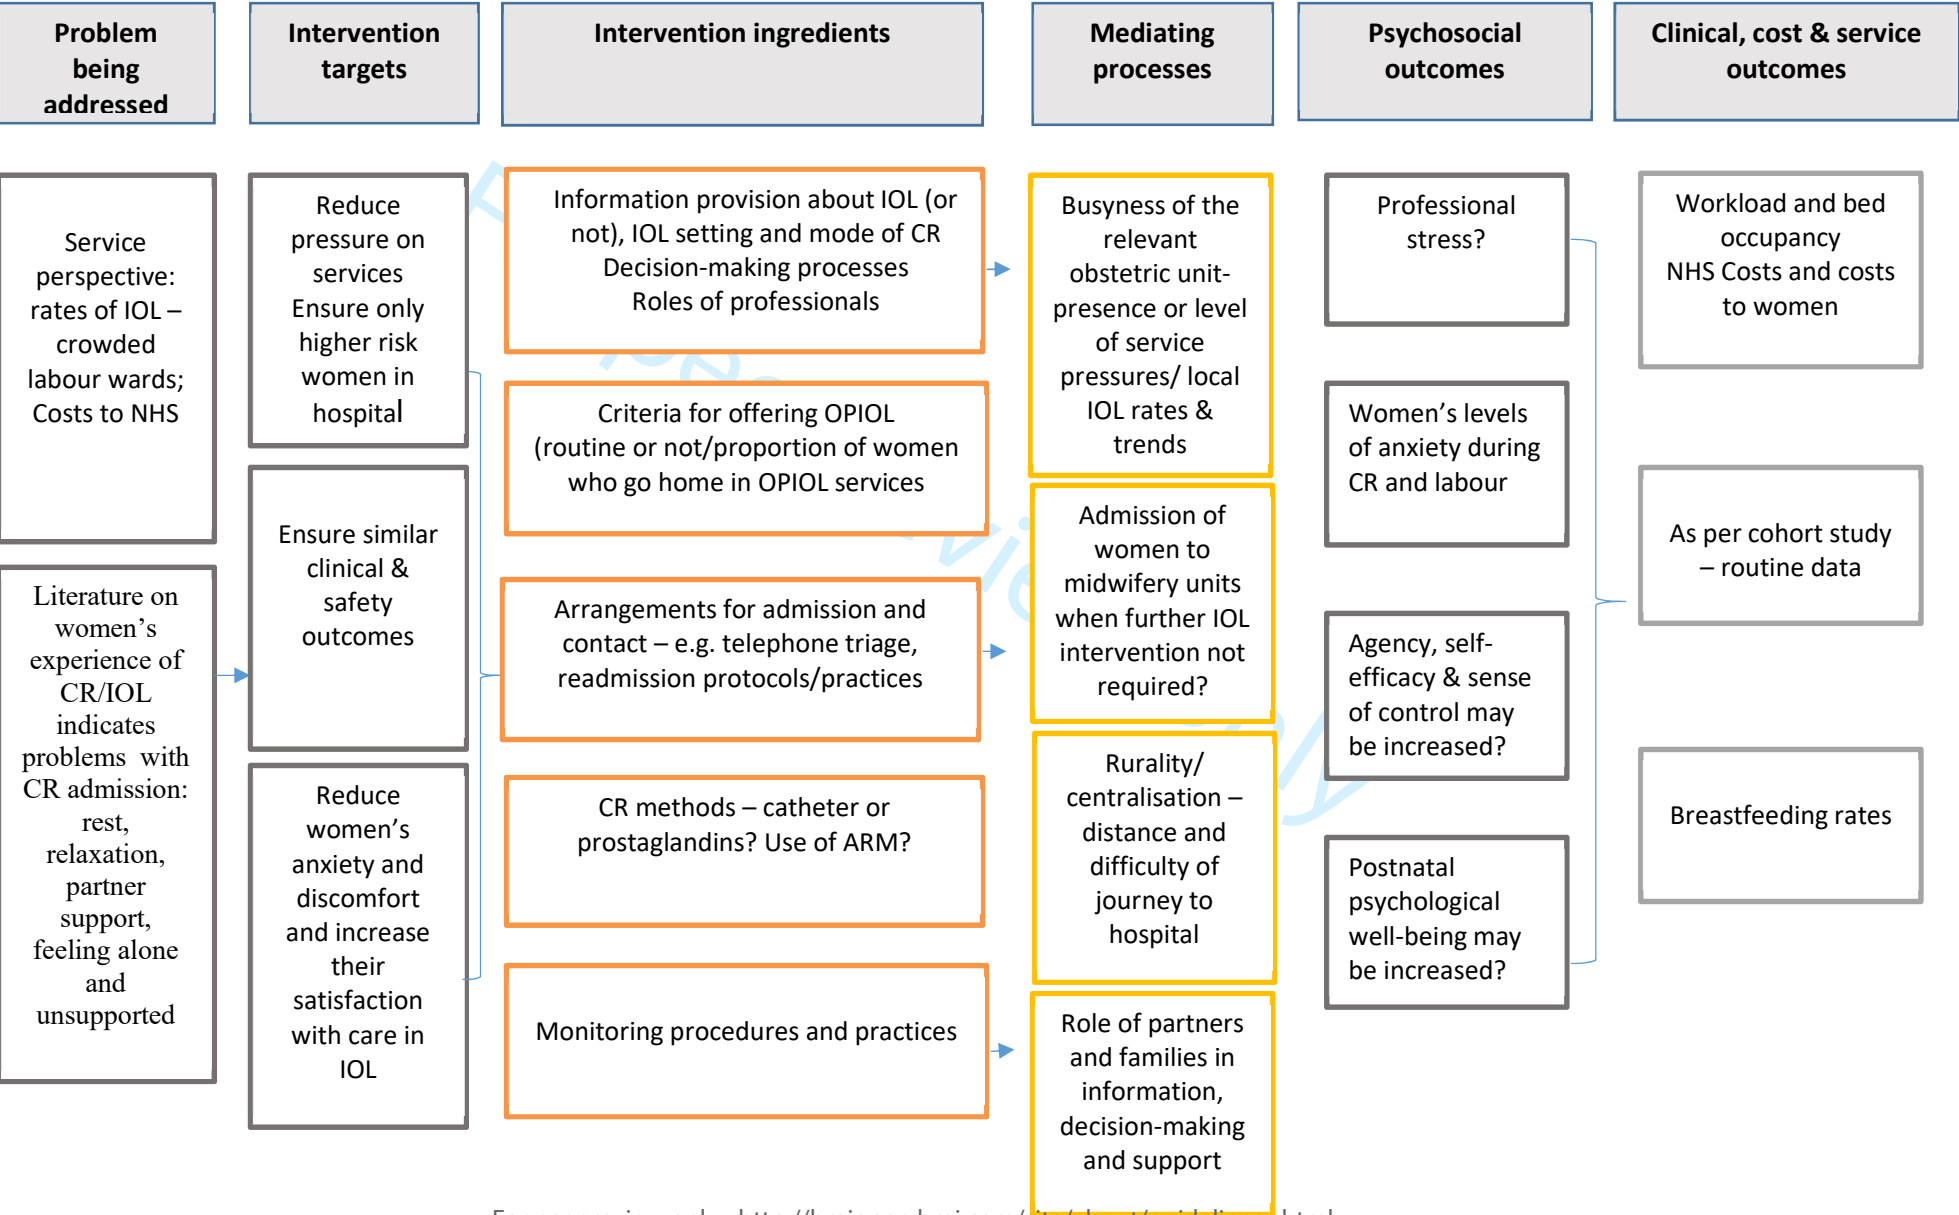

Supplement: bmjopen-2021-050452.draft_revisions.pdf [file bmjopen-2021-050452.draft_revisions.pdf]
