# Supplementary material for: Cervical ripening at home or in-hospital—prospective cohort study and process evaluation (CHOICE) study: a protocol
Source: PubMed Central journal article supplement (PMC8098973; doi:10.1136/bmjopen-2021-050452), 2021-05-04
Supplement: bmjopen-2021-050452.reviewer_comments.pdf [file bmjopen-2021-050452.reviewer_comments.pdf]

## PEER REVIEW HISTORY

BMJ Open publishes all reviews undertaken for accepted manuscripts. Reviewers are asked to complete a checklist review form (<http://bmjopen.bmj.com/site/about/resources/checklist.pdf>) and are provided with free text boxes to elaborate on their assessment. These free text comments are reproduced below.

## ARTICLE DETAILS

|                            |                                                                                                                                                                                                                                                                                                                                        |
|----------------------------|----------------------------------------------------------------------------------------------------------------------------------------------------------------------------------------------------------------------------------------------------------------------------------------------------------------------------------------|
| <b>TITLE (PROVISIONAL)</b> | Cervical ripening at home or in-hospital - prospective cohort study and process evaluation (CHOICE) study: Protocol                                                                                                                                                                                                                    |
| <b>AUTHORS</b>             | Stock, Sarah; Bhide, Amarnath; Richardson, Heather; Black, Mairead; Yuill, Cassandra; Harkness, Mairi; Reid, Maggie; Wee, Fiona; Cheyne, Helen; McCourt, Christine; Rana, Dikshyanta; Boyd, Kathleen; Sanders, Julia; Heera, Neelam; Huddleston, Jane; Denison, Fiona; Pasupathy, Dharmindra; Modi, Neena; Smith, Gordon; Norrie, John |

This article was not externally reviewed at BMJ Open. Protocols that have been independently assessed prior to submission to BMJ Open are usually fast-tracked to publication on the grounds that further substantial changes will not be possible. This independent assessment will usually be external, independent review for both a substantial grant award from a non-commercial or government funder and ethics approval.
